# Supplementary material for: Expanding catchment-scale hydrologic restoration in suburban watersheds via stream mitigation crediting—A Northern Kentucky (USA) case study
Source: Springer Nature journal article supplement (doi:10.1007/s11252-021-01139-x), 2021-06-28
Supplement: MOESM1 [file 19301988]

---

# APPENDIX A

## Project Location Maps

---

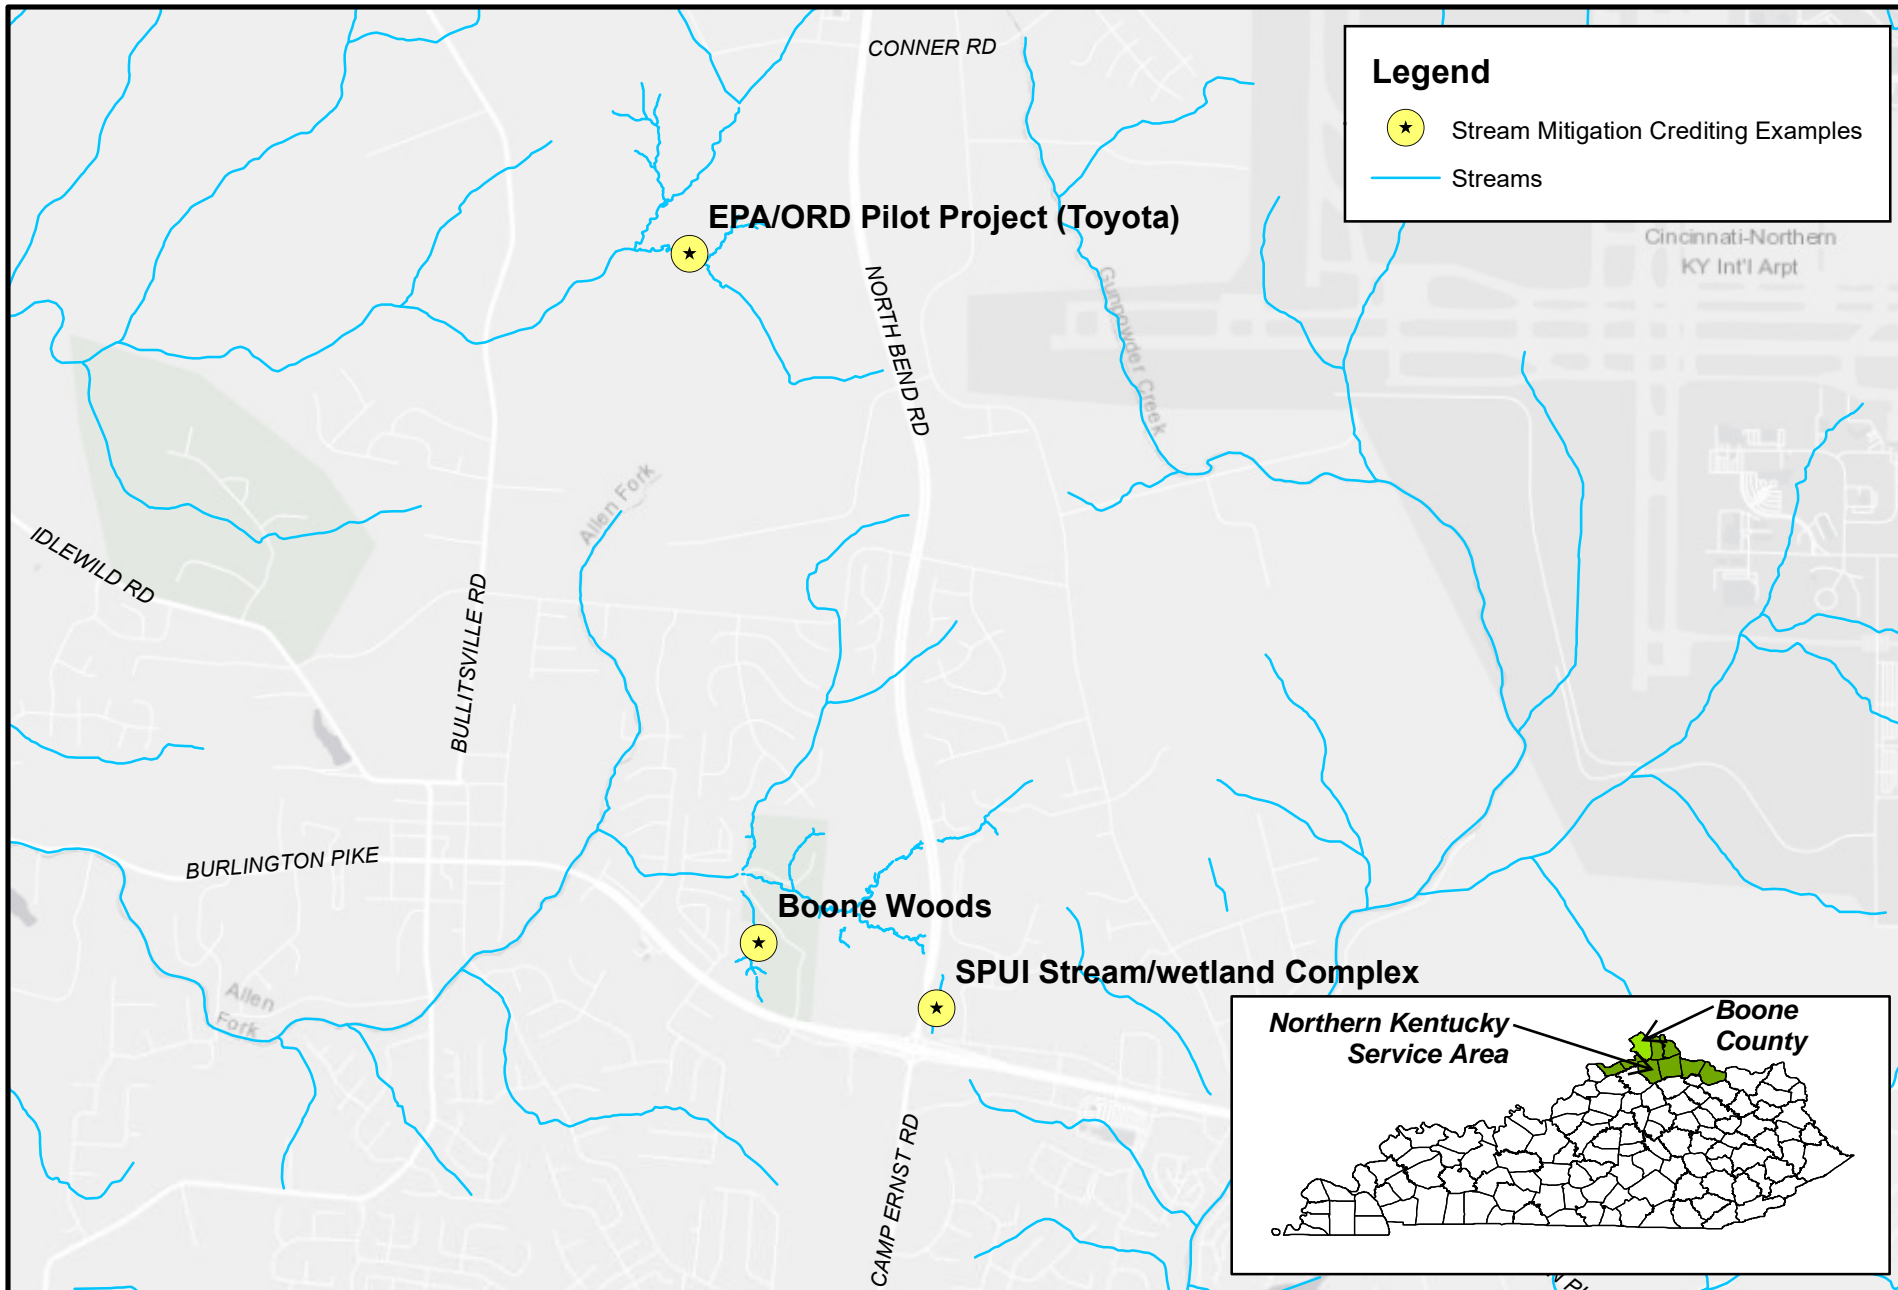

**Legend**

-  Stream Mitigation Crediting Examples
-  Streams

**LOCATION MAP**

**STREAM MITIGATION CREDITING EXAMPLES**  
 MITIGATION ALTERNATIVE METHODOLOGY DEVELOPMENT  
 SANITATION DISTRICT NO. 1 OF NORTHERN KENTUCKY

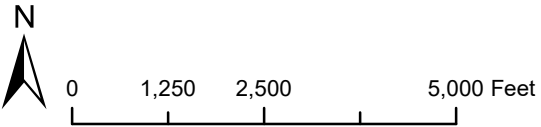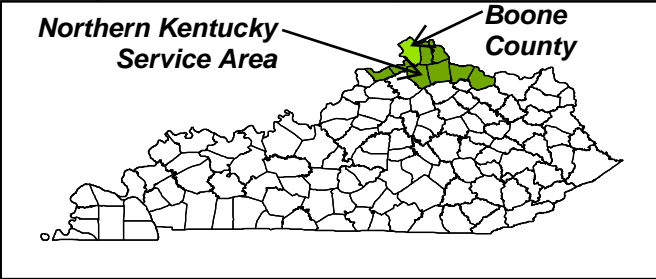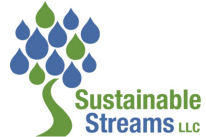

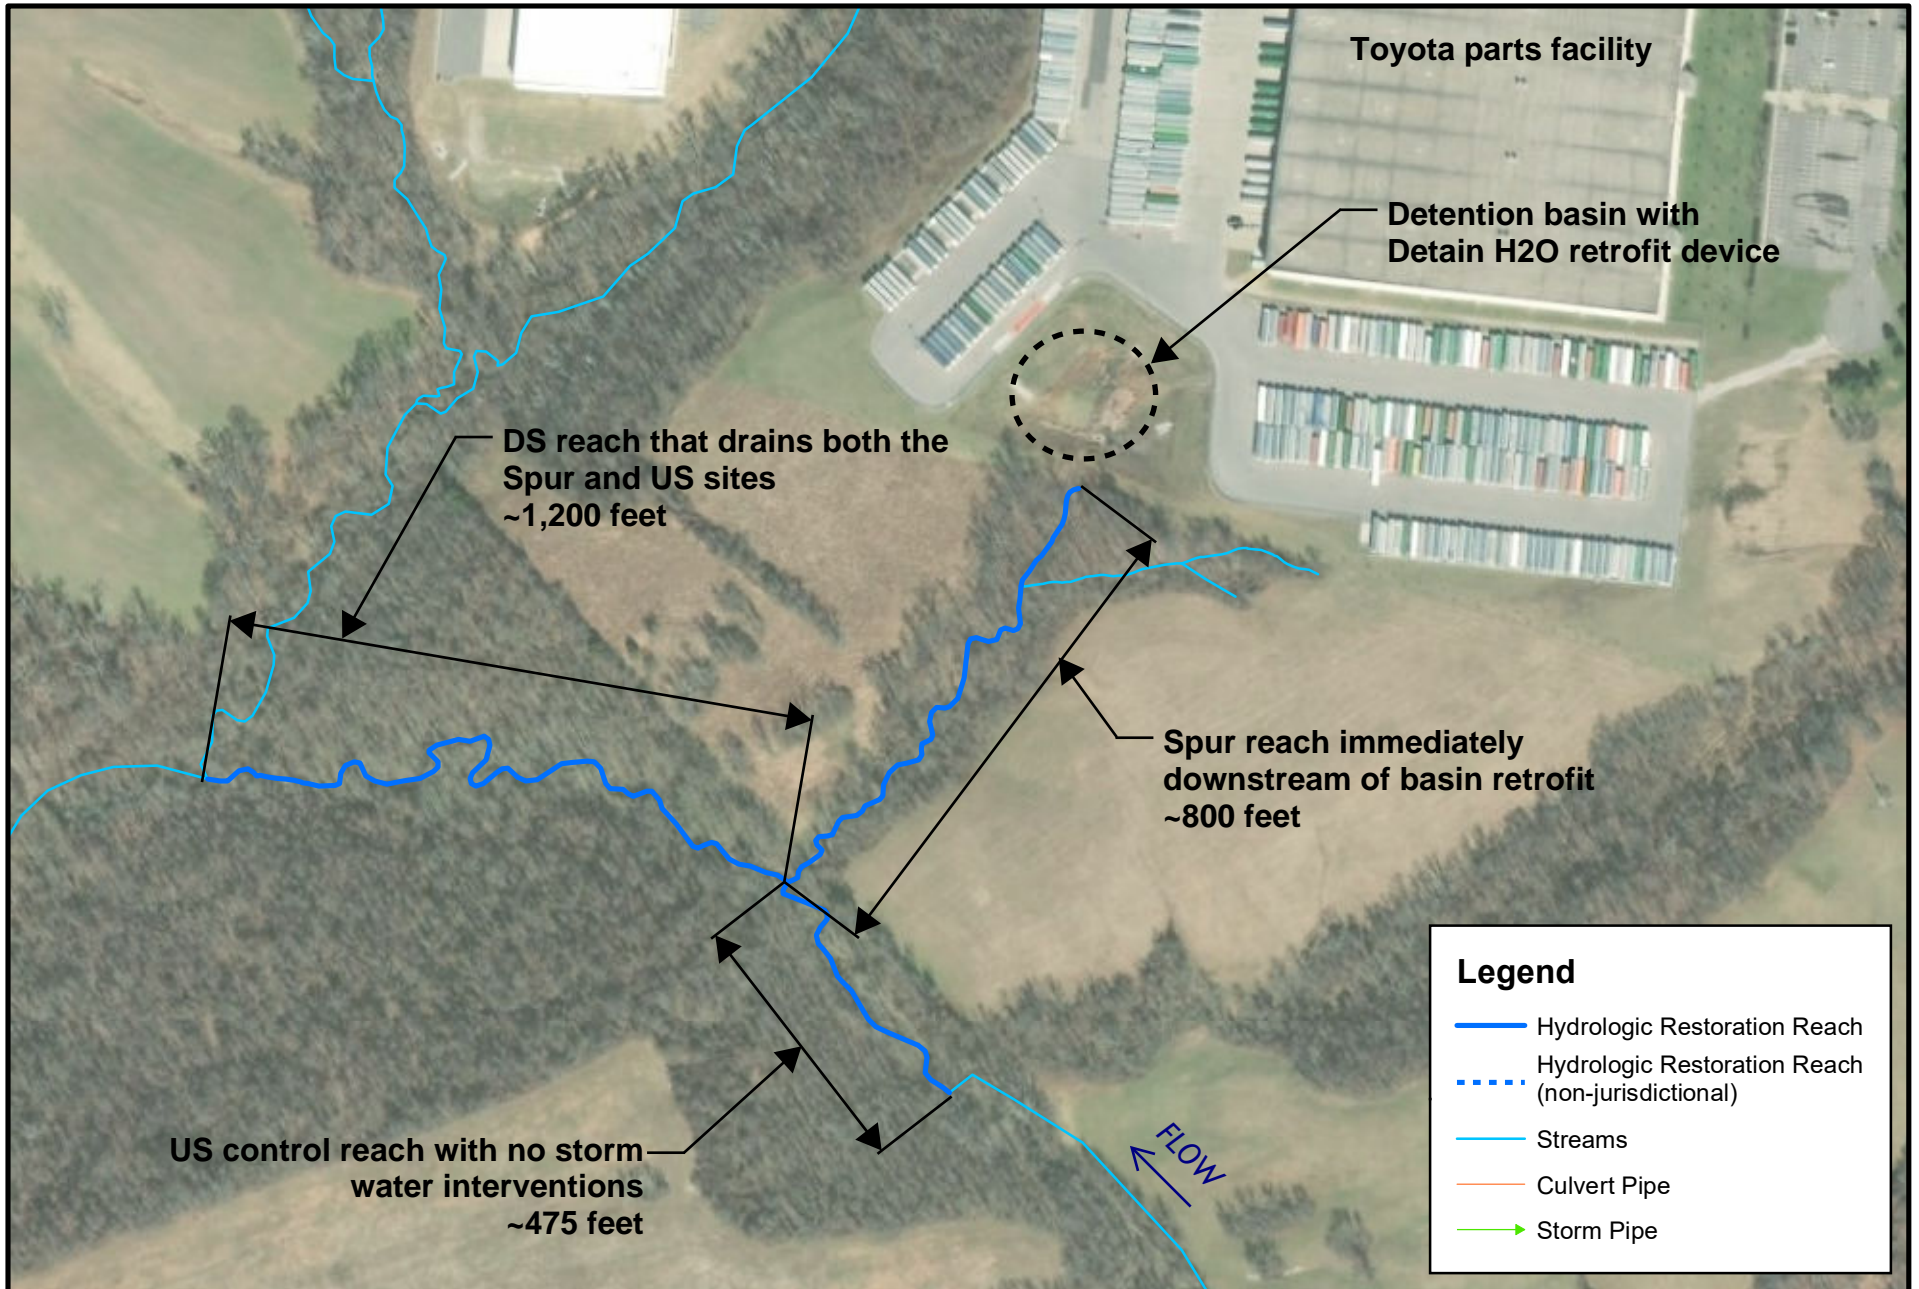

**EPA/ORD PILOT PROJECT (TOYOTA)**  
**STREAM MITIGATION CREDITING EXAMPLES**  
 MITIGATION ALTERNATIVE METHODOLOGY DEVELOPMENT  
 SANITATION DISTRICT NO. 1 OF NORTHERN KENTUCKY

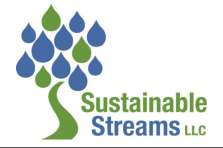



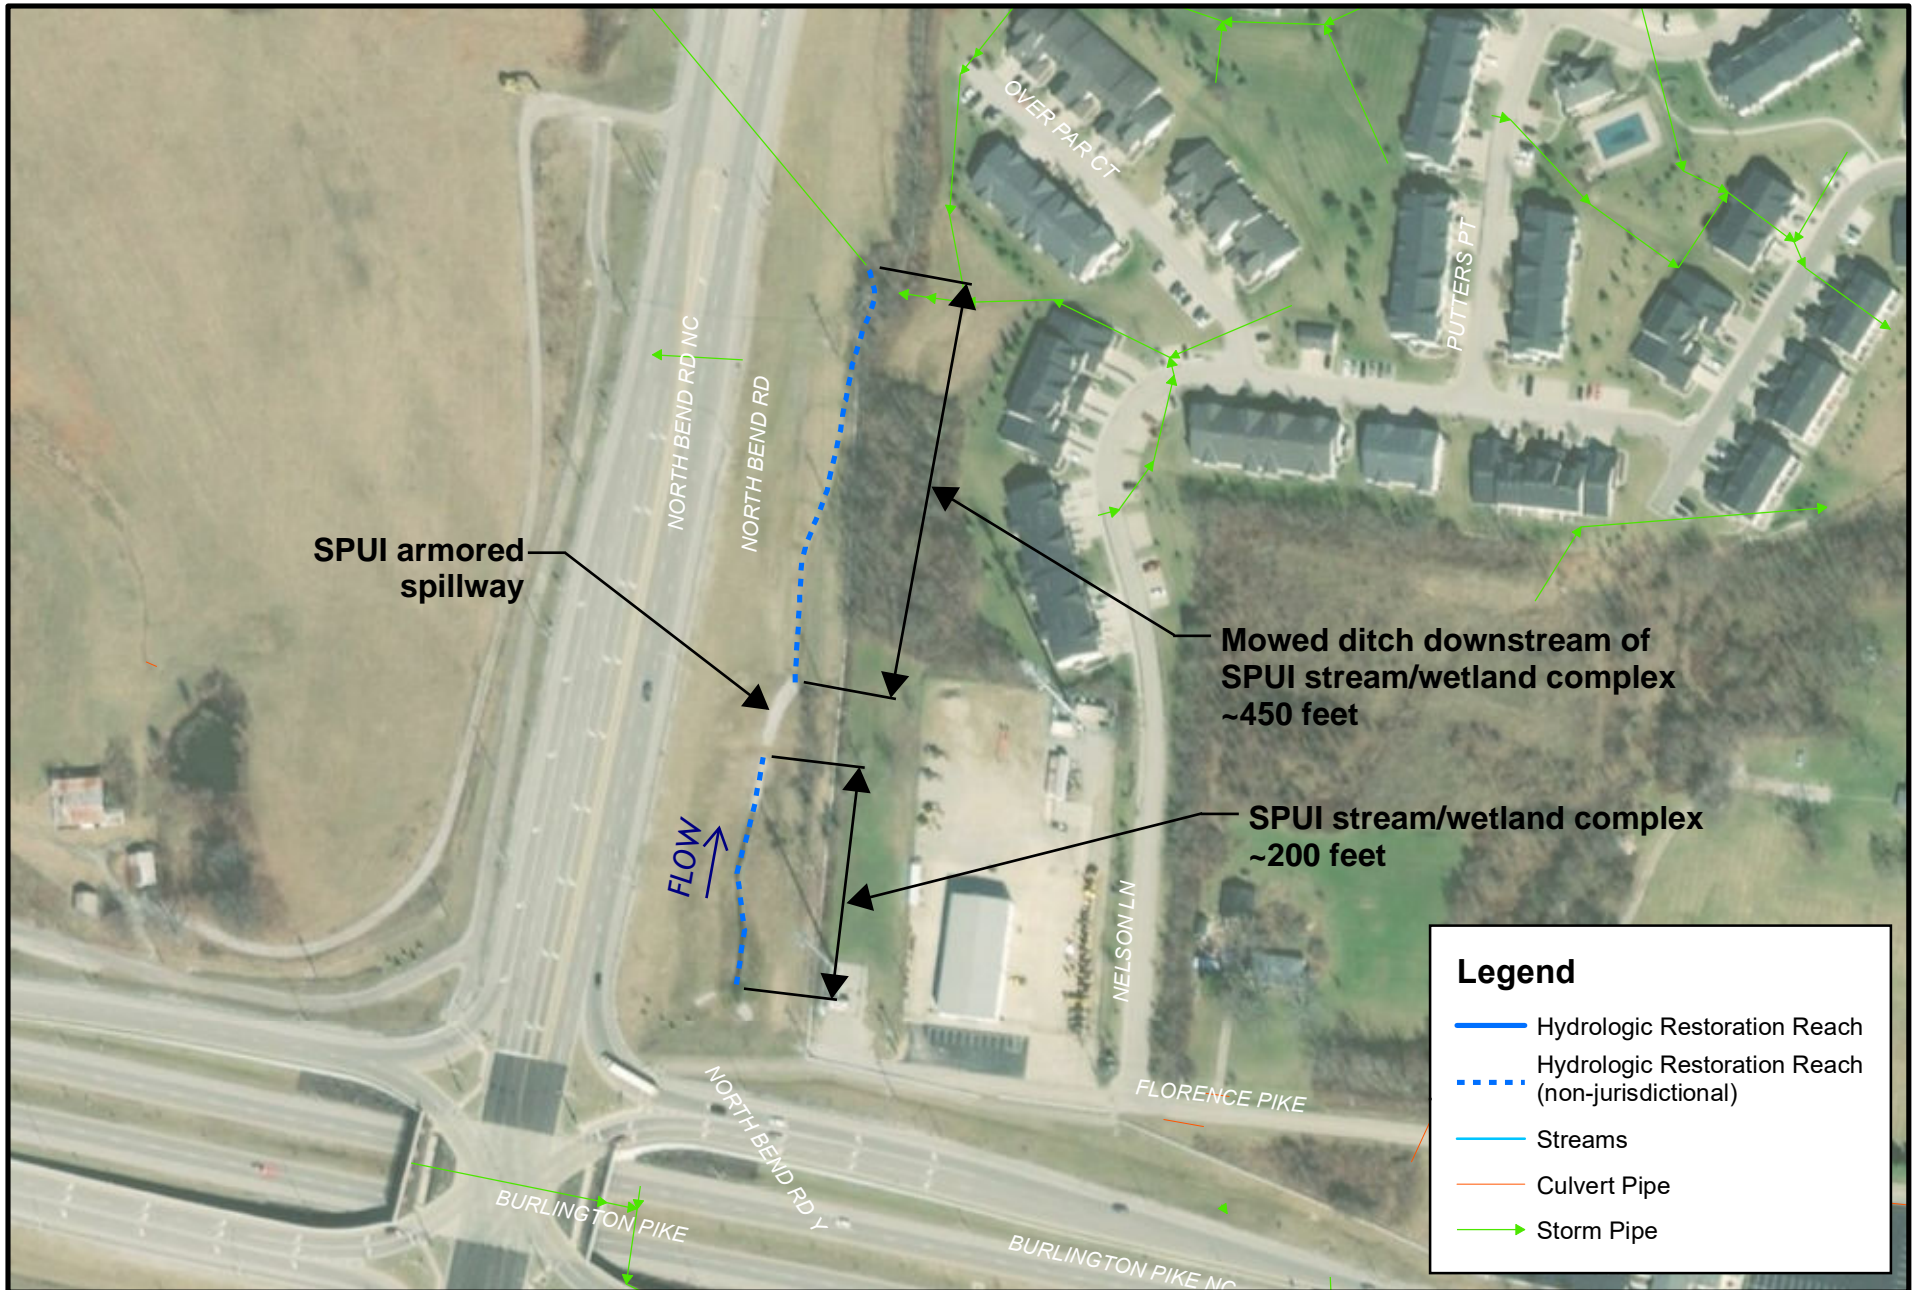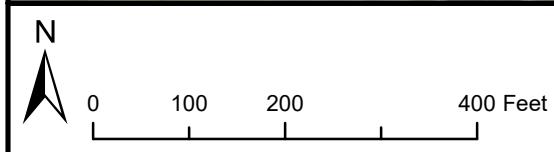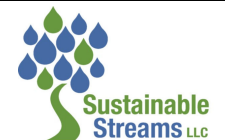

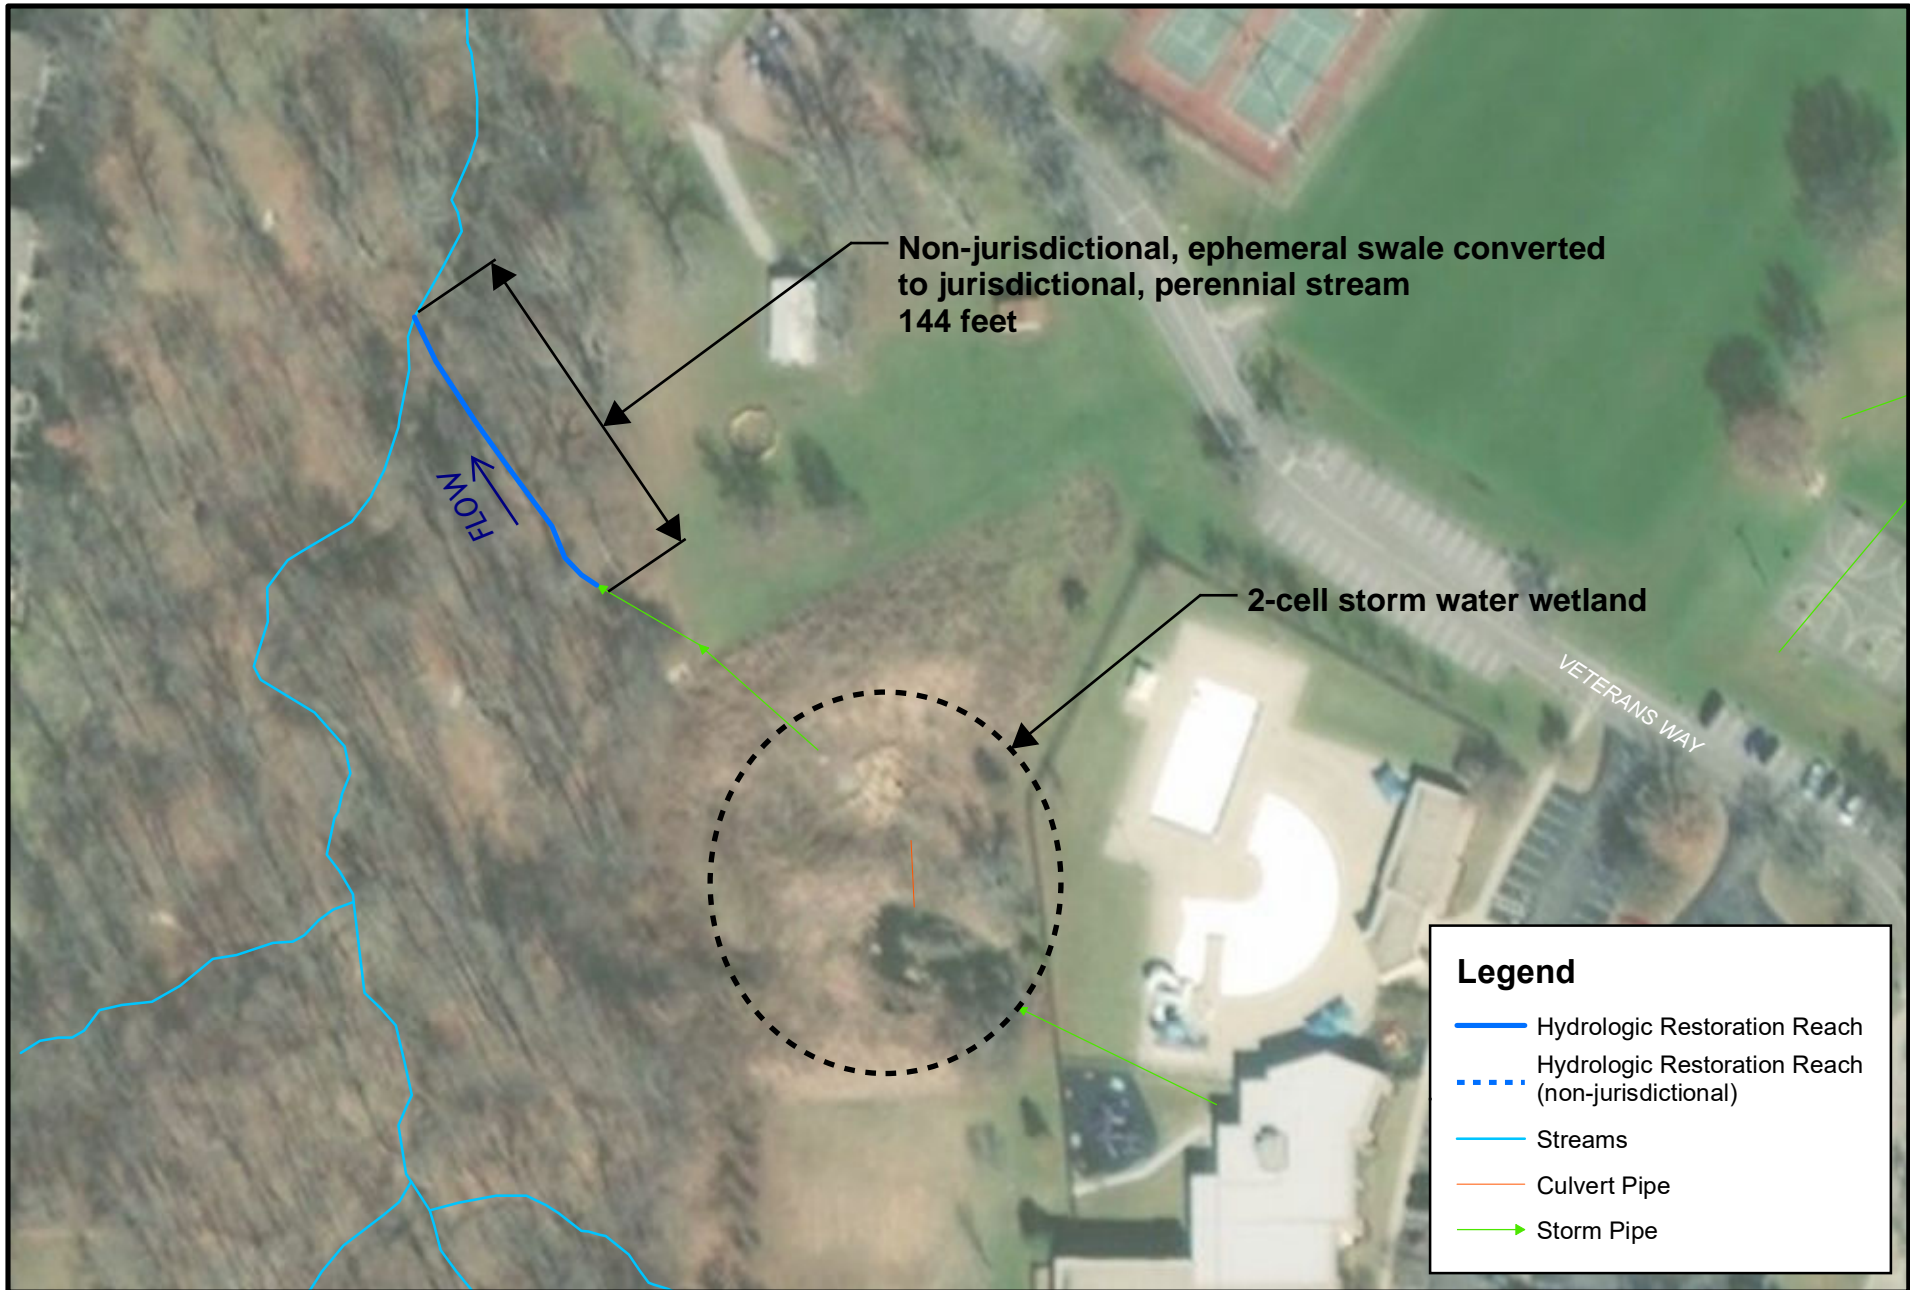

**BOONE WOODS**

**STREAM MITIGATION CREDITING EXAMPLES**

*MITIGATION ALTERNATIVE METHODOLOGY DEVELOPMENT  
SANITATION DISTRICT NO. 1 OF NORTHERN KENTUCKY*

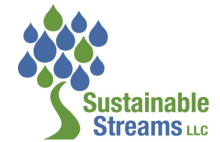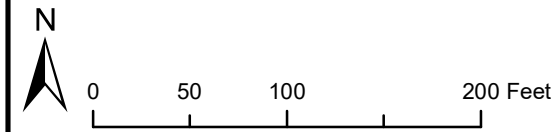

---

# APPENDIX B

## EPA/ORD Pilot Project (Toyota) Rapid Bioassessment Protocol Field Sheets

---

**HABITAT ASSESSMENT FIELD DATA SHEET - HIGH GRADIENT STREAMS, PAGE 1**

|                                |                       |                                                                      |                     |                                                           |
|--------------------------------|-----------------------|----------------------------------------------------------------------|---------------------|-----------------------------------------------------------|
| <b>STREAM NAME:</b> Spur       |                       | <b>LOCATION:</b> Woolper Creek Watershed, near Toyota parts facility |                     |                                                           |
| <b>STREAM WDTN (FT):</b>       | <b>DEPTH (FT):</b>    | <b>PERENNIAL</b>                                                     | <b>INTERMITTENT</b> | <b>EPHEMERAL</b>                                          |
| <b>STATION #:</b> N/A          | <b>RIVERMILE:</b> N/A | <b>COUNTY:</b> Boone                                                 |                     | <b>STATE:</b> KY                                          |
| <b>LAT</b>                     |                       | <b>LONG</b>                                                          |                     |                                                           |
| <b>CLIENT:</b>                 |                       | <b>PROJECT NO.</b> EPA/ORD Pilot Project (i.e. Toyota retrofit)      |                     |                                                           |
| <b>INVESTIGATORS/CREW:</b> RJH |                       |                                                                      |                     |                                                           |
| <b>FORM COMPLETED BY:</b> NLK  |                       | <b>DATE:</b> 12/21/2013                                              |                     | <b>REASON FOR SURVEY:</b> Pre-retrofit habitat assessment |
|                                |                       | <b>TIME:</b>                                                         |                     |                                                           |

| Habitat Parameter                              | Condition Category                                                                                                                                                                                                                                                            |    |    |    |    |                                                                                                                                                                                                                                                             |    |    |    |    |                                                                                                                                                                                                                   |   |   |   |   |                                                                                                                                                                          |   |   |   |   |   |
|------------------------------------------------|-------------------------------------------------------------------------------------------------------------------------------------------------------------------------------------------------------------------------------------------------------------------------------|----|----|----|----|-------------------------------------------------------------------------------------------------------------------------------------------------------------------------------------------------------------------------------------------------------------|----|----|----|----|-------------------------------------------------------------------------------------------------------------------------------------------------------------------------------------------------------------------|---|---|---|---|--------------------------------------------------------------------------------------------------------------------------------------------------------------------------|---|---|---|---|---|
|                                                | Optimal                                                                                                                                                                                                                                                                       |    |    |    |    | Suboptimal                                                                                                                                                                                                                                                  |    |    |    |    | Marginal                                                                                                                                                                                                          |   |   |   |   | Poor                                                                                                                                                                     |   |   |   |   |   |
| <b>1. Epifaunal Substrate/ Available Cover</b> | Greater than 70% of substrate favorable for epifaunal colonization and fish cover; mix of snags, submerged logs, undercut banks, cobble or other stable habitat and at stage to allow full colonization potential (i.e., logs/snags that are not new fall and not transient). |    |    |    |    | 40-70% mix of stable habitat; well suited for full colonization potential; adequate habitat for maintenance of populations; presence of additional substrate in the form of newfall, but not yet prepared for colonization (may rate at high end of scale). |    |    |    |    | 20-40% mix of stable habitat; habitat availability less than desirable; substrate frequently disturbed or removed.                                                                                                |   |   |   |   | Less than 20% stable habitat; lack of habitat is obvious; substrate unstable or lacking.                                                                                 |   |   |   |   |   |
| <b>SCORE:</b> 10                               | 20                                                                                                                                                                                                                                                                            | 19 | 18 | 17 | 16 | 15                                                                                                                                                                                                                                                          | 14 | 13 | 12 | 11 | 10                                                                                                                                                                                                                | 9 | 8 | 7 | 6 | 5                                                                                                                                                                        | 4 | 3 | 2 | 1 | 0 |
| <b>2. Embeddedness</b>                         | Gravel, cobble, and boulder particles are 0-25% surrounded by fine sediment. Layering of cobble provides diversity of niche space.                                                                                                                                            |    |    |    |    | Gravel, cobble, and boulder particles are 25-50% surrounded by fine sediment.                                                                                                                                                                               |    |    |    |    | Gravel, cobble, and boulder particles are 50- 75% surrounded by fine Sediment.                                                                                                                                    |   |   |   |   | Gravel, cobble, and boulder particles are more than 75% surrounded by fine sediment.                                                                                     |   |   |   |   |   |
| <b>SCORE:</b> 10                               | 20                                                                                                                                                                                                                                                                            | 19 | 18 | 17 | 16 | 15                                                                                                                                                                                                                                                          | 14 | 13 | 12 | 11 | 10                                                                                                                                                                                                                | 9 | 8 | 7 | 6 | 5                                                                                                                                                                        | 4 | 3 | 2 | 1 | 0 |
| <b>3. Velocity/Depth Regime</b>                | All four velocity/depth regimes present (slowdeep, slow-shallow, fastdeep, fast-shallow). (Slow is < 0.3 m/s, deep is > 0.5 m.).                                                                                                                                              |    |    |    |    | Only 3 of the 4 regimes present (if fast-shallow is missing, score lower than if missing other regimes).                                                                                                                                                    |    |    |    |    | Only 2 of the 4 habitat regimes present (if fastshallow or slow-shallow are missing, score low).                                                                                                                  |   |   |   |   | Dominated by 1 velocity/depth regime (usually slow-deep).                                                                                                                |   |   |   |   |   |
| <b>SCORE:</b> 10                               | 20                                                                                                                                                                                                                                                                            | 19 | 18 | 17 | 16 | 15                                                                                                                                                                                                                                                          | 14 | 13 | 12 | 11 | 10                                                                                                                                                                                                                | 9 | 8 | 7 | 6 | 5                                                                                                                                                                        | 4 | 3 | 2 | 1 | 0 |
| <b>4. Sediment Deposition</b>                  | Little or no enlargement of islands or point bars and less than 5% of the bottom affected by sediment deposition.                                                                                                                                                             |    |    |    |    | Some new increase in bar formation, mostly from gravel, sand or fine sediment; 5-30% of the bottom affected; slight deposition in pools.                                                                                                                    |    |    |    |    | Moderate deposition of new gravel, sand or fine sediment on old and new bars; 30-50% of the bottom affected; sediment deposits at obstructions, constrictions, and bends; moderate deposition of pools prevalent. |   |   |   |   | Heavy deposits of fine material, increased bar development; more than 50% of the bottom changing frequently; pools almost absent due to substantial sediment deposition. |   |   |   |   |   |
| <b>SCORE:</b> 10                               | 20                                                                                                                                                                                                                                                                            | 19 | 18 | 17 | 16 | 15                                                                                                                                                                                                                                                          | 14 | 13 | 12 | 11 | 10                                                                                                                                                                                                                | 9 | 8 | 7 | 6 | 5                                                                                                                                                                        | 4 | 3 | 2 | 1 | 0 |
| <b>5. Channel Flow Status</b>                  | Water reaches base of both lower banks, and minimal amount of channel substrate is exposed.                                                                                                                                                                                   |    |    |    |    | Water fills >75% of the available channel; or <25% of channel substrate is exposed.                                                                                                                                                                         |    |    |    |    | Water fills 25-75% of the available channel, and/or riffle substrates are mostly exposed.                                                                                                                         |   |   |   |   | Very little water in channel and mostly present as standing pools.                                                                                                       |   |   |   |   |   |
| <b>SCORE:</b> 3                                | 20                                                                                                                                                                                                                                                                            | 19 | 18 | 17 | 16 | 15                                                                                                                                                                                                                                                          | 14 | 13 | 12 | 11 | 10                                                                                                                                                                                                                | 9 | 8 | 7 | 6 | 5                                                                                                                                                                        | 4 | 3 | 2 | 1 | 0 |

Parameters to be evaluated in sampling reach



**HABITAT ASSESSMENT FIELD DATA SHEET - HIGH GRADIENT STREAMS, PAGE 2**

| Habitat Parameter                                                                                      | Condition Category                                                                                                                                                                                                                                                                      |    |    |    |    |                                                                                                                                                                                                                                                                              |    |    |    |    |                                                                                                                                                                                                              |   |   |   |   |                                                                                                                                                                                                     |   |   |   |   |   |
|--------------------------------------------------------------------------------------------------------|-----------------------------------------------------------------------------------------------------------------------------------------------------------------------------------------------------------------------------------------------------------------------------------------|----|----|----|----|------------------------------------------------------------------------------------------------------------------------------------------------------------------------------------------------------------------------------------------------------------------------------|----|----|----|----|--------------------------------------------------------------------------------------------------------------------------------------------------------------------------------------------------------------|---|---|---|---|-----------------------------------------------------------------------------------------------------------------------------------------------------------------------------------------------------|---|---|---|---|---|
|                                                                                                        | Optimal                                                                                                                                                                                                                                                                                 |    |    |    |    | Suboptimal                                                                                                                                                                                                                                                                   |    |    |    |    | Marginal                                                                                                                                                                                                     |   |   |   |   | Poor                                                                                                                                                                                                |   |   |   |   |   |
| <b>6. Channel Alteration</b>                                                                           | Channelization or dredging absent or minimal; stream with normal pattern.                                                                                                                                                                                                               |    |    |    |    | Some channelization present, usually in areas of bridge abutments; evidence of past channelization, i.e., dredging, (>20 yr.) may be present, but recent channelization is not present.                                                                                      |    |    |    |    | Channelization may be extensive; embankments or shoring structures present on both banks; and 40 to 80% of stream reach channelized and disrupted.                                                           |   |   |   |   | Banks shored with gabion or cement; over 80% of the stream reach channelized and disrupted. In stream habitat greatly altered or removed entirely.                                                  |   |   |   |   |   |
| <b>SCORE:</b> 15                                                                                       | 20                                                                                                                                                                                                                                                                                      | 19 | 18 | 17 | 16 | 15                                                                                                                                                                                                                                                                           | 14 | 13 | 12 | 11 | 10                                                                                                                                                                                                           | 9 | 8 | 7 | 6 | 5                                                                                                                                                                                                   | 4 | 3 | 2 | 1 | 0 |
| <b>7. Frequency of Riffles (or bends)</b>                                                              | Occurrence of riffles relatively frequent; ratio of distance between riffles divided by width of the stream < 7:1 (generally 5 to 7); variety of habitat is key. In streams where riffles are continuous, placement of boulders or other large, natural obstruction.                    |    |    |    |    | Occurrence of riffles infrequent; distance between riffles divided by the width of the stream is between 7 to 15.                                                                                                                                                            |    |    |    |    | Occasional riffle or bend; bottom contours provide some habitat; distance between riffles divided by the width of the stream is between 15 to 25.                                                            |   |   |   |   | Generally all flat water or shallow riffles; poor habitat; distance between riffles divided by the width of the stream is a ration of > 25.                                                         |   |   |   |   |   |
| <b>SCORE:</b> 15                                                                                       | 20                                                                                                                                                                                                                                                                                      | 19 | 18 | 17 | 16 | 15                                                                                                                                                                                                                                                                           | 14 | 13 | 12 | 11 | 10                                                                                                                                                                                                           | 9 | 8 | 7 | 6 | 5                                                                                                                                                                                                   | 4 | 3 | 2 | 1 | 0 |
| <b>8. Bank Stability (score each bank)</b><br>Note: determine left or right side by facing downstream. | Banks stable; evidence of erosion or bank failure absent or minimal; little potential for future problems. <5% of bank affected.                                                                                                                                                        |    |    |    |    | Moderately stable; infrequent, small areas of erosion mostly healed over. 5-30% of bank in reach has areas of erosion.                                                                                                                                                       |    |    |    |    | Moderately unstable; 30- 60% of bank in reach has areas of erosion; high erosion potential during floods.                                                                                                    |   |   |   |   | Unstable; many eroded areas; "raw" areas frequent along straight sections and bends; obvious bank sloughing; 60-100% of bank has erosional scars.                                                   |   |   |   |   |   |
| <b>SCORE (LB):</b> 4                                                                                   | Left Bank                                                                                                                                                                                                                                                                               |    | 10 | 9  | 8  | 7                                                                                                                                                                                                                                                                            | 6  | 5  | 4  | 3  | 2                                                                                                                                                                                                            | 1 | 0 |   |   |                                                                                                                                                                                                     |   |   |   |   |   |
| <b>SCORE (RB):</b> 7                                                                                   | Right Bank                                                                                                                                                                                                                                                                              |    | 10 | 9  | 8  | 7                                                                                                                                                                                                                                                                            | 6  | 5  | 4  | 3  | 2                                                                                                                                                                                                            | 1 | 0 |   |   |                                                                                                                                                                                                     |   |   |   |   |   |
| <b>9. Vegetative Protection (score each bank)</b>                                                      | More than 90% of the stream bank surfaces and immediate riparian zone covered by native vegetation, including trees, understory shrubs, or non- woody macrophytes; vegetative disruption through grazing or mowing minimal or not evident; almost all plants allowed to grow naturally. |    |    |    |    | 70-90% of the stream bank surfaces covered by native vegetation, but one class of plants is not well- represented; disruption evident but not affecting full plant growth potential to any great extent; more than one-half of the potential plant stubble height remaining. |    |    |    |    | 50-70% of the stream bank surfaces covered by vegetation; disruption obvious; patches of bare soil or closely cropped vegetation common; less than one-half of the potential plant stubble height remaining. |   |   |   |   | Less than 50% of the stream bank surfaces covered by vegetation; disruption of stream bank vegetation is very high; vegetation has been removed to 5 centimeters or less in average stubble height. |   |   |   |   |   |
| <b>SCORE (LB):</b> 5                                                                                   | Left Bank                                                                                                                                                                                                                                                                               |    | 10 | 9  | 8  | 7                                                                                                                                                                                                                                                                            | 6  | 5  | 4  | 3  | 2                                                                                                                                                                                                            | 1 | 0 |   |   |                                                                                                                                                                                                     |   |   |   |   |   |
| <b>SCORE (RB):</b> 6                                                                                   | Right Bank                                                                                                                                                                                                                                                                              |    | 10 | 9  | 8  | 7                                                                                                                                                                                                                                                                            | 6  | 5  | 4  | 3  | 2                                                                                                                                                                                                            | 1 | 0 |   |   |                                                                                                                                                                                                     |   |   |   |   |   |
| <b>10. Riparian Vegetative Zone Width (score each bank riparian zone)</b>                              | Width of riparian zone >18 meters; human activities (i.e., parking lots, roadbeds, clear-cuts, lawns, or crops) have not impacted zone.                                                                                                                                                 |    |    |    |    | Width of riparian zone 12- 18 meters; human activities have impacted zone only minimally.                                                                                                                                                                                    |    |    |    |    | Width of riparian zone 6- 12 meters; human activities have impacted zone a great deal.                                                                                                                       |   |   |   |   | Width of riparian zone <6 meters: little or no riparian vegetation due to human activities.                                                                                                         |   |   |   |   |   |
| <b>SCORE (LB):</b> 9                                                                                   | Left Bank                                                                                                                                                                                                                                                                               |    | 10 | 9  | 8  | 7                                                                                                                                                                                                                                                                            | 6  | 5  | 4  | 3  | 2                                                                                                                                                                                                            | 1 | 0 |   |   |                                                                                                                                                                                                     |   |   |   |   |   |
| <b>SCORE (RB):</b> 9                                                                                   | Right Bank                                                                                                                                                                                                                                                                              |    | 10 | 9  | 8  | 7                                                                                                                                                                                                                                                                            | 6  | 5  | 4  | 3  | 2                                                                                                                                                                                                            | 1 | 0 |   |   |                                                                                                                                                                                                     |   |   |   |   |   |
| <b>TOTAL SCORE:</b>                                                                                    | <b>113</b>                                                                                                                                                                                                                                                                              |    |    |    |    |                                                                                                                                                                                                                                                                              |    |    |    |    |                                                                                                                                                                                                              |   |   |   |   |                                                                                                                                                                                                     |   |   |   |   |   |

Parameters to be evaluated in sampling reach



**HABITAT ASSESSMENT FIELD DATA SHEET - HIGH GRADIENT STREAMS, PAGE 1**

|                                |                       |                                                                      |                     |                                                            |
|--------------------------------|-----------------------|----------------------------------------------------------------------|---------------------|------------------------------------------------------------|
| <b>STREAM NAME:</b> Spur       |                       | <b>LOCATION:</b> Woolper Creek Watershed, near Toyota parts facility |                     |                                                            |
| <b>STREAM WDT (FT):</b>        | <b>DEPTH (FT):</b>    | <b>PERENNIAL</b>                                                     | <b>INTERMITTENT</b> | <b>EPHEMERAL</b>                                           |
| <b>STATION #:</b> N/A          | <b>RIVERMILE:</b> N/A | <b>COUNTY:</b> Boone                                                 |                     | <b>STATE:</b> KY                                           |
| <b>LAT</b>                     |                       | <b>LONG</b>                                                          |                     |                                                            |
| <b>CLIENT:</b>                 |                       | <b>PROJECT NO.</b> EPA/ORD Pilot Project (i.e. Toyota retrofit)      |                     |                                                            |
| <b>INVESTIGATORS/CREW:</b> RJH |                       |                                                                      |                     |                                                            |
| <b>FORM COMPLETED BY:</b> NLK  |                       | <b>DATE:</b> 7/8/2019                                                |                     | <b>REASON FOR SURVEY:</b> Post-retrofit habitat assessment |
|                                |                       | <b>TIME:</b>                                                         |                     |                                                            |

| Habitat Parameter                              | Condition Category                                                                                                                                                                                                                                                            |    |    |    |    |                                                                                                                                                                                                                                                             |    |    |    |    |                                                                                                                                                                                                                   |   |   |   |   |                                                                                                                                                                          |   |   |   |   |   |
|------------------------------------------------|-------------------------------------------------------------------------------------------------------------------------------------------------------------------------------------------------------------------------------------------------------------------------------|----|----|----|----|-------------------------------------------------------------------------------------------------------------------------------------------------------------------------------------------------------------------------------------------------------------|----|----|----|----|-------------------------------------------------------------------------------------------------------------------------------------------------------------------------------------------------------------------|---|---|---|---|--------------------------------------------------------------------------------------------------------------------------------------------------------------------------|---|---|---|---|---|
|                                                | Optimal                                                                                                                                                                                                                                                                       |    |    |    |    | Suboptimal                                                                                                                                                                                                                                                  |    |    |    |    | Marginal                                                                                                                                                                                                          |   |   |   |   | Poor                                                                                                                                                                     |   |   |   |   |   |
| <b>1. Epifaunal Substrate/ Available Cover</b> | Greater than 70% of substrate favorable for epifaunal colonization and fish cover; mix of snags, submerged logs, undercut banks, cobble or other stable habitat and at stage to allow full colonization potential (i.e., logs/snags that are not new fall and not transient). |    |    |    |    | 40-70% mix of stable habitat; well suited for full colonization potential; adequate habitat for maintenance of populations; presence of additional substrate in the form of newfall, but not yet prepared for colonization (may rate at high end of scale). |    |    |    |    | 20-40% mix of stable habitat; habitat availability less than desirable; substrate frequently disturbed or removed.                                                                                                |   |   |   |   | Less than 20% stable habitat; lack of habitat is obvious; substrate unstable or lacking.                                                                                 |   |   |   |   |   |
| <b>SCORE:</b> 17                               | 20                                                                                                                                                                                                                                                                            | 19 | 18 | 17 | 16 | 15                                                                                                                                                                                                                                                          | 14 | 13 | 12 | 11 | 10                                                                                                                                                                                                                | 9 | 8 | 7 | 6 | 5                                                                                                                                                                        | 4 | 3 | 2 | 1 | 0 |
| <b>2. Embeddedness</b>                         | Gravel, cobble, and boulder particles are 0-25% surrounded by fine sediment. Layering of cobble provides diversity of niche space.                                                                                                                                            |    |    |    |    | Gravel, cobble, and boulder particles are 25-50% surrounded by fine sediment.                                                                                                                                                                               |    |    |    |    | Gravel, cobble, and boulder particles are 50- 75% surrounded by fine Sediment.                                                                                                                                    |   |   |   |   | Gravel, cobble, and boulder particles are more than 75% surrounded by fine sediment.                                                                                     |   |   |   |   |   |
| <b>SCORE:</b> 14                               | 20                                                                                                                                                                                                                                                                            | 19 | 18 | 17 | 16 | 15                                                                                                                                                                                                                                                          | 14 | 13 | 12 | 11 | 10                                                                                                                                                                                                                | 9 | 8 | 7 | 6 | 5                                                                                                                                                                        | 4 | 3 | 2 | 1 | 0 |
| <b>3. Velocity/Depth Regime</b>                | All four velocity/depth regimes present (slowdeep, slow-shallow, fastdeep, fast-shallow). (Slow is < 0.3 m/s, deep is > 0.5 m.).                                                                                                                                              |    |    |    |    | Only 3 of the 4 regimes present (if fast-shallow is missing, score lower than if missing other regimes).                                                                                                                                                    |    |    |    |    | Only 2 of the 4 habitat regimes present (if fastshallow or slow-shallow are missing, score low).                                                                                                                  |   |   |   |   | Dominated by 1 velocity/depth regime (usually slow-deep).                                                                                                                |   |   |   |   |   |
| <b>SCORE:</b> 10                               | 20                                                                                                                                                                                                                                                                            | 19 | 18 | 17 | 16 | 15                                                                                                                                                                                                                                                          | 14 | 13 | 12 | 11 | 10                                                                                                                                                                                                                | 9 | 8 | 7 | 6 | 5                                                                                                                                                                        | 4 | 3 | 2 | 1 | 0 |
| <b>4. Sediment Deposition</b>                  | Little or no enlargement of islands or point bars and less than 5% of the bottom affected by sediment deposition.                                                                                                                                                             |    |    |    |    | Some new increase in bar formation, mostly from gravel, sand or fine sediment; 5-30% of the bottom affected; slight deposition in pools.                                                                                                                    |    |    |    |    | Moderate deposition of new gravel, sand or fine sediment on old and new bars; 30-50% of the bottom affected; sediment deposits at obstructions, constrictions, and bends; moderate deposition of pools prevalent. |   |   |   |   | Heavy deposits of fine material, increased bar development; more than 50% of the bottom changing frequently; pools almost absent due to substantial sediment deposition. |   |   |   |   |   |
| <b>SCORE:</b> 15                               | 20                                                                                                                                                                                                                                                                            | 19 | 18 | 17 | 16 | 15                                                                                                                                                                                                                                                          | 14 | 13 | 12 | 11 | 10                                                                                                                                                                                                                | 9 | 8 | 7 | 6 | 5                                                                                                                                                                        | 4 | 3 | 2 | 1 | 0 |
| <b>5. Channel Flow Status</b>                  | Water reaches base of both lower banks, and minimal amount of channel substrate is exposed.                                                                                                                                                                                   |    |    |    |    | Water fills >75% of the available channel; or <25% of channel substrate is exposed.                                                                                                                                                                         |    |    |    |    | Water fills 25-75% of the available channel, and/or riffle substrates are mostly exposed.                                                                                                                         |   |   |   |   | Very little water in channel and mostly present as standing pools.                                                                                                       |   |   |   |   |   |
| <b>SCORE:</b> 7                                | 20                                                                                                                                                                                                                                                                            | 19 | 18 | 17 | 16 | 15                                                                                                                                                                                                                                                          | 14 | 13 | 12 | 11 | 10                                                                                                                                                                                                                | 9 | 8 | 7 | 6 | 5                                                                                                                                                                        | 4 | 3 | 2 | 1 | 0 |

Parameters to be evaluated in sampling reach

**HABITAT ASSESSMENT FIELD DATA SHEET - HIGH GRADIENT STREAMS, PAGE 2**

| Habitat Parameter                                                                                      | Condition Category                                                                                                                                                                                                                                                                      |    |    |    |    |                                                                                                                                                                                                                                                                              |    |    |    |    |                                                                                                                                                                                                              |   |   |   |   |                                                                                                                                                                                                     |   |   |   |   |   |
|--------------------------------------------------------------------------------------------------------|-----------------------------------------------------------------------------------------------------------------------------------------------------------------------------------------------------------------------------------------------------------------------------------------|----|----|----|----|------------------------------------------------------------------------------------------------------------------------------------------------------------------------------------------------------------------------------------------------------------------------------|----|----|----|----|--------------------------------------------------------------------------------------------------------------------------------------------------------------------------------------------------------------|---|---|---|---|-----------------------------------------------------------------------------------------------------------------------------------------------------------------------------------------------------|---|---|---|---|---|
|                                                                                                        | Optimal                                                                                                                                                                                                                                                                                 |    |    |    |    | Suboptimal                                                                                                                                                                                                                                                                   |    |    |    |    | Marginal                                                                                                                                                                                                     |   |   |   |   | Poor                                                                                                                                                                                                |   |   |   |   |   |
| <b>6. Channel Alteration</b>                                                                           | Channelization or dredging absent or minimal; stream with normal pattern.                                                                                                                                                                                                               |    |    |    |    | Some channelization present, usually in areas of bridge abutments; evidence of past channelization, i.e., dredging, (>20 yr.) may be present, but recent channelization is not present.                                                                                      |    |    |    |    | Channelization may be extensive; embankments or shoring structures present on both banks; and 40 to 80% of stream reach channelized and disrupted.                                                           |   |   |   |   | Banks shored with gabion or cement; over 80% of the stream reach channelized and disrupted. In stream habitat greatly altered or removed entirely.                                                  |   |   |   |   |   |
| <b>SCORE:</b> 15                                                                                       | 20                                                                                                                                                                                                                                                                                      | 19 | 18 | 17 | 16 | 15                                                                                                                                                                                                                                                                           | 14 | 13 | 12 | 11 | 10                                                                                                                                                                                                           | 9 | 8 | 7 | 6 | 5                                                                                                                                                                                                   | 4 | 3 | 2 | 1 | 0 |
| <b>7. Frequency of Riffles (or bends)</b>                                                              | Occurrence of riffles relatively frequent; ratio of distance between riffles divided by width of the stream < 7:1 (generally 5 to 7); variety of habitat is key. In streams where riffles are continuous, placement of boulders or other large, natural obstruction.                    |    |    |    |    | Occurrence of riffles infrequent; distance between riffles divided by the width of the stream is between 7 to 15.                                                                                                                                                            |    |    |    |    | Occasional riffle or bend; bottom contours provide some habitat; distance between riffles divided by the width of the stream is between 15 to 25.                                                            |   |   |   |   | Generally all flat water or shallow riffles; poor habitat; distance between riffles divided by the width of the stream is a ration of > 25.                                                         |   |   |   |   |   |
| <b>SCORE:</b> 15                                                                                       | 20                                                                                                                                                                                                                                                                                      | 19 | 18 | 17 | 16 | 15                                                                                                                                                                                                                                                                           | 14 | 13 | 12 | 11 | 10                                                                                                                                                                                                           | 9 | 8 | 7 | 6 | 5                                                                                                                                                                                                   | 4 | 3 | 2 | 1 | 0 |
| <b>8. Bank Stability (score each bank)</b><br>Note: determine left or right side by facing downstream. | Banks stable; evidence of erosion or bank failure absent or minimal; little potential for future problems. <5% of bank affected.                                                                                                                                                        |    |    |    |    | Moderately stable; infrequent, small areas of erosion mostly healed over. 5-30% of bank in reach has areas of erosion.                                                                                                                                                       |    |    |    |    | Moderately unstable; 30- 60% of bank in reach has areas of erosion; high erosion potential during floods.                                                                                                    |   |   |   |   | Unstable; many eroded areas; "raw" areas frequent along straight sections and bends; obvious bank sloughing; 60-100% of bank has erosional scars.                                                   |   |   |   |   |   |
| <b>SCORE (LB):</b> 8                                                                                   | Left Bank                                                                                                                                                                                                                                                                               |    | 10 | 9  | 8  | 7                                                                                                                                                                                                                                                                            | 6  | 5  | 4  | 3  | 2                                                                                                                                                                                                            | 1 | 0 |   |   |                                                                                                                                                                                                     |   |   |   |   |   |
| <b>SCORE (RB):</b> 8                                                                                   | Right Bank                                                                                                                                                                                                                                                                              |    | 10 | 9  | 8  | 7                                                                                                                                                                                                                                                                            | 6  | 5  | 4  | 3  | 2                                                                                                                                                                                                            | 1 | 0 |   |   |                                                                                                                                                                                                     |   |   |   |   |   |
| <b>9. Vegetative Protection (score each bank)</b>                                                      | More than 90% of the stream bank surfaces and immediate riparian zone covered by native vegetation, including trees, understory shrubs, or non- woody macrophytes; vegetative disruption through grazing or mowing minimal or not evident; almost all plants allowed to grow naturally. |    |    |    |    | 70-90% of the stream bank surfaces covered by native vegetation, but one class of plants is not well- represented; disruption evident but not affecting full plant growth potential to any great extent; more than one-half of the potential plant stubble height remaining. |    |    |    |    | 50-70% of the stream bank surfaces covered by vegetation; disruption obvious; patches of bare soil or closely cropped vegetation common; less than one-half of the potential plant stubble height remaining. |   |   |   |   | Less than 50% of the stream bank surfaces covered by vegetation; disruption of stream bank vegetation is very high; vegetation has been removed to 5 centimeters or less in average stubble height. |   |   |   |   |   |
| <b>SCORE (LB):</b> 8                                                                                   | Left Bank                                                                                                                                                                                                                                                                               |    | 10 | 9  | 8  | 7                                                                                                                                                                                                                                                                            | 6  | 5  | 4  | 3  | 2                                                                                                                                                                                                            | 1 | 0 |   |   |                                                                                                                                                                                                     |   |   |   |   |   |
| <b>SCORE (RB):</b> 8                                                                                   | Right Bank                                                                                                                                                                                                                                                                              |    | 10 | 9  | 8  | 7                                                                                                                                                                                                                                                                            | 6  | 5  | 4  | 3  | 2                                                                                                                                                                                                            | 1 | 0 |   |   |                                                                                                                                                                                                     |   |   |   |   |   |
| <b>10. Riparian Vegetative Zone Width (score each bank riparian zone)</b>                              | Width of riparian zone >18 meters; human activities (i.e., parking lots, roadbeds, clear-cuts, lawns, or crops) have not impacted zone.                                                                                                                                                 |    |    |    |    | Width of riparian zone 12- 18 meters; human activities have impacted zone only minimally.                                                                                                                                                                                    |    |    |    |    | Width of riparian zone 6- 12 meters; human activities have impacted zone a great deal.                                                                                                                       |   |   |   |   | Width of riparian zone <6 meters: little or no riparian vegetation due to human activities.                                                                                                         |   |   |   |   |   |
| <b>SCORE (LB):</b> 9                                                                                   | Left Bank                                                                                                                                                                                                                                                                               |    | 10 | 9  | 8  | 7                                                                                                                                                                                                                                                                            | 6  | 5  | 4  | 3  | 2                                                                                                                                                                                                            | 1 | 0 |   |   |                                                                                                                                                                                                     |   |   |   |   |   |
| <b>SCORE (RB):</b> 9                                                                                   | Right Bank                                                                                                                                                                                                                                                                              |    | 10 | 9  | 8  | 7                                                                                                                                                                                                                                                                            | 6  | 5  | 4  | 3  | 2                                                                                                                                                                                                            | 1 | 0 |   |   |                                                                                                                                                                                                     |   |   |   |   |   |
| <b>TOTAL SCORE:</b>                                                                                    | <b>143</b>                                                                                                                                                                                                                                                                              |    |    |    |    |                                                                                                                                                                                                                                                                              |    |    |    |    |                                                                                                                                                                                                              |   |   |   |   |                                                                                                                                                                                                     |   |   |   |   |   |

Parameters to be evaluated in sampling reach

**HABITAT ASSESSMENT FIELD DATA SHEET - HIGH GRADIENT STREAMS, PAGE 1**

|                                         |                       |                                                                      |                     |                                                           |
|-----------------------------------------|-----------------------|----------------------------------------------------------------------|---------------------|-----------------------------------------------------------|
| <b>STREAM NAME:</b> Upstream (US) reach |                       | <b>LOCATION:</b> Woolper Creek Watershed, near Toyota parts facility |                     |                                                           |
| <b>STREAM WDT (FT):</b>                 | <b>DEPTH (FT):</b>    | <b>PERENNIAL</b>                                                     | <b>INTERMITTENT</b> | <b>EPHEMERAL</b>                                          |
| <b>STATION #:</b> N/A                   | <b>RIVERMILE:</b> N/A | <b>COUNTY:</b> Boone                                                 |                     | <b>STATE:</b> KY                                          |
| <b>LAT</b>                              |                       | <b>LONG</b>                                                          |                     |                                                           |
| <b>CLIENT:</b>                          |                       | <b>PROJECT NO.</b> EPA/ORD Pilot Project (i.e. Toyota retrofit)      |                     |                                                           |
| <b>INVESTIGATORS/CREW:</b> RJH          |                       |                                                                      |                     |                                                           |
| <b>FORM COMPLETED BY:</b> NLK           |                       | <b>DATE:</b> 8/26/2013                                               |                     | <b>REASON FOR SURVEY:</b> Pre-retrofit habitat assessment |
|                                         |                       | <b>TIME:</b>                                                         |                     |                                                           |

| Habitat Parameter                              | Condition Category                                                                                                                                                                                                                                                            |    |    |    |    |                                                                                                                                                                                                                                                             |    |    |    |    |                                                                                                                                                                                                                   |   |   |   |   |                                                                                                                                                                          |   |   |   |   |   |
|------------------------------------------------|-------------------------------------------------------------------------------------------------------------------------------------------------------------------------------------------------------------------------------------------------------------------------------|----|----|----|----|-------------------------------------------------------------------------------------------------------------------------------------------------------------------------------------------------------------------------------------------------------------|----|----|----|----|-------------------------------------------------------------------------------------------------------------------------------------------------------------------------------------------------------------------|---|---|---|---|--------------------------------------------------------------------------------------------------------------------------------------------------------------------------|---|---|---|---|---|
|                                                | Optimal                                                                                                                                                                                                                                                                       |    |    |    |    | Suboptimal                                                                                                                                                                                                                                                  |    |    |    |    | Marginal                                                                                                                                                                                                          |   |   |   |   | Poor                                                                                                                                                                     |   |   |   |   |   |
| <b>1. Epifaunal Substrate/ Available Cover</b> | Greater than 70% of substrate favorable for epifaunal colonization and fish cover; mix of snags, submerged logs, undercut banks, cobble or other stable habitat and at stage to allow full colonization potential (i.e., logs/snags that are not new fall and not transient). |    |    |    |    | 40-70% mix of stable habitat; well suited for full colonization potential; adequate habitat for maintenance of populations; presence of additional substrate in the form of newfall, but not yet prepared for colonization (may rate at high end of scale). |    |    |    |    | 20-40% mix of stable habitat; habitat availability less than desirable; substrate frequently disturbed or removed.                                                                                                |   |   |   |   | Less than 20% stable habitat; lack of habitat is obvious; substrate unstable or lacking.                                                                                 |   |   |   |   |   |
| <b>SCORE:</b> 17                               | 20                                                                                                                                                                                                                                                                            | 19 | 18 | 17 | 16 | 15                                                                                                                                                                                                                                                          | 14 | 13 | 12 | 11 | 10                                                                                                                                                                                                                | 9 | 8 | 7 | 6 | 5                                                                                                                                                                        | 4 | 3 | 2 | 1 | 0 |
| <b>2. Embeddedness</b>                         | Gravel, cobble, and boulder particles are 0-25% surrounded by fine sediment. Layering of cobble provides diversity of niche space.                                                                                                                                            |    |    |    |    | Gravel, cobble, and boulder particles are 25-50% surrounded by fine sediment.                                                                                                                                                                               |    |    |    |    | Gravel, cobble, and boulder particles are 50- 75% surrounded by fine Sediment.                                                                                                                                    |   |   |   |   | Gravel, cobble, and boulder particles are more than 75% surrounded by fine sediment.                                                                                     |   |   |   |   |   |
| <b>SCORE:</b> 18                               | 20                                                                                                                                                                                                                                                                            | 19 | 18 | 17 | 16 | 15                                                                                                                                                                                                                                                          | 14 | 13 | 12 | 11 | 10                                                                                                                                                                                                                | 9 | 8 | 7 | 6 | 5                                                                                                                                                                        | 4 | 3 | 2 | 1 | 0 |
| <b>3. Velocity/Depth Regime</b>                | All four velocity/depth regimes present (slowdeep, slow-shallow, fastdeep, fast-shallow). (Slow is < 0.3 m/s, deep is > 0.5 m.).                                                                                                                                              |    |    |    |    | Only 3 of the 4 regimes present (if fast-shallow is missing, score lower than if missing other regimes).                                                                                                                                                    |    |    |    |    | Only 2 of the 4 habitat regimes present (if fastshallow or slow-shallow are missing, score low).                                                                                                                  |   |   |   |   | Dominated by 1 velocity/depth regime (usually slow-deep).                                                                                                                |   |   |   |   |   |
| <b>SCORE:</b> 10                               | 20                                                                                                                                                                                                                                                                            | 19 | 18 | 17 | 16 | 15                                                                                                                                                                                                                                                          | 14 | 13 | 12 | 11 | 10                                                                                                                                                                                                                | 9 | 8 | 7 | 6 | 5                                                                                                                                                                        | 4 | 3 | 2 | 1 | 0 |
| <b>4. Sediment Deposition</b>                  | Little or no enlargement of islands or point bars and less than 5% of the bottom affected by sediment deposition.                                                                                                                                                             |    |    |    |    | Some new increase in bar formation, mostly from gravel, sand or fine sediment; 5-30% of the bottom affected; slight deposition in pools.                                                                                                                    |    |    |    |    | Moderate deposition of new gravel, sand or fine sediment on old and new bars; 30-50% of the bottom affected; sediment deposits at obstructions, constrictions, and bends; moderate deposition of pools prevalent. |   |   |   |   | Heavy deposits of fine material, increased bar development; more than 50% of the bottom changing frequently; pools almost absent due to substantial sediment deposition. |   |   |   |   |   |
| <b>SCORE:</b> 17                               | 20                                                                                                                                                                                                                                                                            | 19 | 18 | 17 | 16 | 15                                                                                                                                                                                                                                                          | 14 | 13 | 12 | 11 | 10                                                                                                                                                                                                                | 9 | 8 | 7 | 6 | 5                                                                                                                                                                        | 4 | 3 | 2 | 1 | 0 |
| <b>5. Channel Flow Status</b>                  | Water reaches base of both lower banks, and minimal amount of channel substrate is exposed.                                                                                                                                                                                   |    |    |    |    | Water fills >75% of the available channel; or <25% of channel substrate is exposed.                                                                                                                                                                         |    |    |    |    | Water fills 25-75% of the available channel, and/or riffle substrates are mostly exposed.                                                                                                                         |   |   |   |   | Very little water in channel and mostly present as standing pools.                                                                                                       |   |   |   |   |   |
| <b>SCORE:</b> 12                               | 20                                                                                                                                                                                                                                                                            | 19 | 18 | 17 | 16 | 15                                                                                                                                                                                                                                                          | 14 | 13 | 12 | 11 | 10                                                                                                                                                                                                                | 9 | 8 | 7 | 6 | 5                                                                                                                                                                        | 4 | 3 | 2 | 1 | 0 |

Parameters to be evaluated in sampling reach

HABITAT ASSESSMENT FIELD DATA SHEET - HIGH GRADIENT STREAMS, PAGE 2

| Habitat Parameter                                                                                      | Condition Category                                                                                                                                                                                                                                                                      |            |    |    |    |                                                                                                                                                                                                                                                                              |    |    |    |    |                                                                                                                                                                                                              |    |   |   |   |                                                                                                                                                                                                     |   |   |   |   |   |   |
|--------------------------------------------------------------------------------------------------------|-----------------------------------------------------------------------------------------------------------------------------------------------------------------------------------------------------------------------------------------------------------------------------------------|------------|----|----|----|------------------------------------------------------------------------------------------------------------------------------------------------------------------------------------------------------------------------------------------------------------------------------|----|----|----|----|--------------------------------------------------------------------------------------------------------------------------------------------------------------------------------------------------------------|----|---|---|---|-----------------------------------------------------------------------------------------------------------------------------------------------------------------------------------------------------|---|---|---|---|---|---|
|                                                                                                        | Optimal                                                                                                                                                                                                                                                                                 |            |    |    |    | Suboptimal                                                                                                                                                                                                                                                                   |    |    |    |    | Marginal                                                                                                                                                                                                     |    |   |   |   | Poor                                                                                                                                                                                                |   |   |   |   |   |   |
| <b>6. Channel Alteration</b>                                                                           | Channelization or dredging absent or minimal; stream with normal pattern.                                                                                                                                                                                                               |            |    |    |    | Some channelization present, usually in areas of bridge abutments; evidence of past channelization, i.e., dredging, (>20 yr.) may be present, but recent channelization is not present.                                                                                      |    |    |    |    | Channelization may be extensive; embankments or shoring structures present on both banks; and 40 to 80% of stream reach channelized and disrupted.                                                           |    |   |   |   | Banks shored with gabion or cement; over 80% of the stream reach channelized and disrupted. In stream habitat greatly altered or removed entirely.                                                  |   |   |   |   |   |   |
| <b>SCORE:</b>                                                                                          | 15                                                                                                                                                                                                                                                                                      | 20         | 19 | 18 | 17 | 16                                                                                                                                                                                                                                                                           | 15 | 14 | 13 | 12 | 11                                                                                                                                                                                                           | 10 | 9 | 8 | 7 | 6                                                                                                                                                                                                   | 5 | 4 | 3 | 2 | 1 | 0 |
| <b>7. Frequency of Riffles (or bends)</b>                                                              | Occurrence of riffles relatively frequent; ratio of distance between riffles divided by width of the stream < 7:1 (generally 5 to 7); variety of habitat is key. In streams where riffles are continuous, placement of boulders or other large, natural obstruction.                    |            |    |    |    | Occurrence of riffles infrequent; distance between riffles divided by the width of the stream is between 7 to 15.                                                                                                                                                            |    |    |    |    | Occasional riffle or bend; bottom contours provide some habitat; distance between riffles divided by the width of the stream is between 15 to 25.                                                            |    |   |   |   | Generally all flat water or shallow riffles; poor habitat; distance between riffles divided by the width of the stream is a ration of > 25.                                                         |   |   |   |   |   |   |
| <b>SCORE:</b>                                                                                          | 14                                                                                                                                                                                                                                                                                      | 20         | 19 | 18 | 17 | 16                                                                                                                                                                                                                                                                           | 15 | 14 | 13 | 12 | 11                                                                                                                                                                                                           | 10 | 9 | 8 | 7 | 6                                                                                                                                                                                                   | 5 | 4 | 3 | 2 | 1 | 0 |
| <b>8. Bank Stability (score each bank)</b><br>Note: determine left or right side by facing downstream. | Banks stable; evidence of erosion or bank failure absent or minimal; little potential for future problems. <5% of bank affected.                                                                                                                                                        |            |    |    |    | Moderately stable; infrequent, small areas of erosion mostly healed over. 5-30% of bank in reach has areas of erosion.                                                                                                                                                       |    |    |    |    | Moderately unstable; 30- 60% of bank in reach has areas of erosion; high erosion potential during floods.                                                                                                    |    |   |   |   | Unstable; many eroded areas; "raw" areas frequent along straight sections and bends; obvious bank sloughing; 60-100% of bank has erosional scars.                                                   |   |   |   |   |   |   |
| <b>SCORE (LB):</b>                                                                                     | 8                                                                                                                                                                                                                                                                                       | Left Bank  |    | 10 | 9  | 8                                                                                                                                                                                                                                                                            | 7  | 6  | 5  | 4  | 3                                                                                                                                                                                                            | 2  | 1 | 0 |   |                                                                                                                                                                                                     |   |   |   |   |   |   |
| <b>SCORE (RB):</b>                                                                                     | 7                                                                                                                                                                                                                                                                                       | Right Bank |    | 10 | 9  | 8                                                                                                                                                                                                                                                                            | 7  | 6  | 5  | 4  | 3                                                                                                                                                                                                            | 2  | 1 | 0 |   |                                                                                                                                                                                                     |   |   |   |   |   |   |
| <b>9. Vegetative Protection (score each bank)</b>                                                      | More than 90% of the stream bank surfaces and immediate riparian zone covered by native vegetation, including trees, understory shrubs, or non- woody macrophytes; vegetative disruption through grazing or mowing minimal or not evident; almost all plants allowed to grow naturally. |            |    |    |    | 70-90% of the stream bank surfaces covered by native vegetation, but one class of plants is not well- represented; disruption evident but not affecting full plant growth potential to any great extent; more than one-half of the potential plant stubble height remaining. |    |    |    |    | 50-70% of the stream bank surfaces covered by vegetation; disruption obvious; patches of bare soil or closely cropped vegetation common; less than one-half of the potential plant stubble height remaining. |    |   |   |   | Less than 50% of the stream bank surfaces covered by vegetation; disruption of stream bank vegetation is very high; vegetation has been removed to 5 centimeters or less in average stubble height. |   |   |   |   |   |   |
| <b>SCORE (LB):</b>                                                                                     | 8                                                                                                                                                                                                                                                                                       | Left Bank  |    | 10 | 9  | 8                                                                                                                                                                                                                                                                            | 7  | 6  | 5  | 4  | 3                                                                                                                                                                                                            | 2  | 1 | 0 |   |                                                                                                                                                                                                     |   |   |   |   |   |   |
| <b>SCORE (RB):</b>                                                                                     | 7                                                                                                                                                                                                                                                                                       | Right Bank |    | 10 | 9  | 8                                                                                                                                                                                                                                                                            | 7  | 6  | 5  | 4  | 3                                                                                                                                                                                                            | 2  | 1 | 0 |   |                                                                                                                                                                                                     |   |   |   |   |   |   |
| <b>10. Riparian Vegetative Zone Width (score each bank riparian zone)</b>                              | Width of riparian zone >18 meters; human activities (i.e., parking lots, roadbeds, clear-cuts, lawns, or crops) have not impacted zone.                                                                                                                                                 |            |    |    |    | Width of riparian zone 12- 18 meters; human activities have impacted zone only minimally.                                                                                                                                                                                    |    |    |    |    | Width of riparian zone 6- 12 meters; human activities have impacted zone a great deal.                                                                                                                       |    |   |   |   | Width of riparian zone <6 meters: little or no riparian vegetation due to human activities.                                                                                                         |   |   |   |   |   |   |
| <b>SCORE (LB):</b>                                                                                     | 9                                                                                                                                                                                                                                                                                       | Left Bank  |    | 10 | 9  | 8                                                                                                                                                                                                                                                                            | 7  | 6  | 5  | 4  | 3                                                                                                                                                                                                            | 2  | 1 | 0 |   |                                                                                                                                                                                                     |   |   |   |   |   |   |
| <b>SCORE (RB):</b>                                                                                     | 9                                                                                                                                                                                                                                                                                       | Right Bank |    | 10 | 9  | 8                                                                                                                                                                                                                                                                            | 7  | 6  | 5  | 4  | 3                                                                                                                                                                                                            | 2  | 1 | 0 |   |                                                                                                                                                                                                     |   |   |   |   |   |   |
| <b>TOTAL SCORE:</b>                                                                                    | <b>151</b>                                                                                                                                                                                                                                                                              |            |    |    |    |                                                                                                                                                                                                                                                                              |    |    |    |    |                                                                                                                                                                                                              |    |   |   |   |                                                                                                                                                                                                     |   |   |   |   |   |   |

Parameters to be evaluated in sampling reach



**HABITAT ASSESSMENT FIELD DATA SHEET - HIGH GRADIENT STREAMS, PAGE 1**

|                                         |                       |                                                                      |                     |                                                            |
|-----------------------------------------|-----------------------|----------------------------------------------------------------------|---------------------|------------------------------------------------------------|
| <b>STREAM NAME:</b> Upstream (US) reach |                       | <b>LOCATION:</b> Woolper Creek Watershed, near Toyota parts facility |                     |                                                            |
| <b>STREAM WDTN (FT):</b>                | <b>DEPTH (FT):</b>    | <b>PERENNIAL</b>                                                     | <b>INTERMITTENT</b> | <b>EPHEMERAL</b>                                           |
| <b>STATION #:</b> N/A                   | <b>RIVERMILE:</b> N/A | <b>COUNTY:</b> Boone                                                 |                     | <b>STATE:</b> KY                                           |
| <b>LAT</b>                              |                       | <b>LONG</b>                                                          |                     |                                                            |
| <b>CLIENT:</b>                          |                       | <b>PROJECT NO.</b> EPA/ORD Pilot Project (i.e. Toyota retrofit)      |                     |                                                            |
| <b>INVESTIGATORS/CREW:</b> RJH          |                       |                                                                      |                     |                                                            |
| <b>FORM COMPLETED BY:</b> NLK           |                       | <b>DATE:</b> 7/8/2019                                                |                     | <b>REASON FOR SURVEY:</b> Post-retrofit habitat assessment |
|                                         |                       | <b>TIME:</b>                                                         |                     |                                                            |

| Habitat Parameter                              | Condition Category                                                                                                                                                                                                                                                            |    |    |    |    |                                                                                                                                                                                                                                                             |    |    |    |    |                                                                                                                                                                                                                   |   |   |   |   |                                                                                                                                                                          |   |   |   |   |   |
|------------------------------------------------|-------------------------------------------------------------------------------------------------------------------------------------------------------------------------------------------------------------------------------------------------------------------------------|----|----|----|----|-------------------------------------------------------------------------------------------------------------------------------------------------------------------------------------------------------------------------------------------------------------|----|----|----|----|-------------------------------------------------------------------------------------------------------------------------------------------------------------------------------------------------------------------|---|---|---|---|--------------------------------------------------------------------------------------------------------------------------------------------------------------------------|---|---|---|---|---|
|                                                | Optimal                                                                                                                                                                                                                                                                       |    |    |    |    | Suboptimal                                                                                                                                                                                                                                                  |    |    |    |    | Marginal                                                                                                                                                                                                          |   |   |   |   | Poor                                                                                                                                                                     |   |   |   |   |   |
| <b>1. Epifaunal Substrate/ Available Cover</b> | Greater than 70% of substrate favorable for epifaunal colonization and fish cover; mix of snags, submerged logs, undercut banks, cobble or other stable habitat and at stage to allow full colonization potential (i.e., logs/snags that are not new fall and not transient). |    |    |    |    | 40-70% mix of stable habitat; well suited for full colonization potential; adequate habitat for maintenance of populations; presence of additional substrate in the form of newfall, but not yet prepared for colonization (may rate at high end of scale). |    |    |    |    | 20-40% mix of stable habitat; habitat availability less than desirable; substrate frequently disturbed or removed.                                                                                                |   |   |   |   | Less than 20% stable habitat; lack of habitat is obvious; substrate unstable or lacking.                                                                                 |   |   |   |   |   |
| <b>SCORE:</b> 15                               | 20                                                                                                                                                                                                                                                                            | 19 | 18 | 17 | 16 | 15                                                                                                                                                                                                                                                          | 14 | 13 | 12 | 11 | 10                                                                                                                                                                                                                | 9 | 8 | 7 | 6 | 5                                                                                                                                                                        | 4 | 3 | 2 | 1 | 0 |
| <b>2. Embeddedness</b>                         | Gravel, cobble, and boulder particles are 0-25% surrounded by fine sediment. Layering of cobble provides diversity of niche space.                                                                                                                                            |    |    |    |    | Gravel, cobble, and boulder particles are 25-50% surrounded by fine sediment.                                                                                                                                                                               |    |    |    |    | Gravel, cobble, and boulder particles are 50- 75% surrounded by fine Sediment.                                                                                                                                    |   |   |   |   | Gravel, cobble, and boulder particles are more than 75% surrounded by fine sediment.                                                                                     |   |   |   |   |   |
| <b>SCORE:</b> 16                               | 20                                                                                                                                                                                                                                                                            | 19 | 18 | 17 | 16 | 15                                                                                                                                                                                                                                                          | 14 | 13 | 12 | 11 | 10                                                                                                                                                                                                                | 9 | 8 | 7 | 6 | 5                                                                                                                                                                        | 4 | 3 | 2 | 1 | 0 |
| <b>3. Velocity/Depth Regime</b>                | All four velocity/depth regimes present (slowdeep, slow-shallow, fastdeep, fast-shallow). (Slow is < 0.3 m/s, deep is > 0.5 m.).                                                                                                                                              |    |    |    |    | Only 3 of the 4 regimes present (if fast-shallow is missing, score lower than if missing other regimes).                                                                                                                                                    |    |    |    |    | Only 2 of the 4 habitat regimes present (if fastshallow or slow-shallow are missing, score low).                                                                                                                  |   |   |   |   | Dominated by 1 velocity/depth regime (usually slow-deep).                                                                                                                |   |   |   |   |   |
| <b>SCORE:</b> 10                               | 20                                                                                                                                                                                                                                                                            | 19 | 18 | 17 | 16 | 15                                                                                                                                                                                                                                                          | 14 | 13 | 12 | 11 | 10                                                                                                                                                                                                                | 9 | 8 | 7 | 6 | 5                                                                                                                                                                        | 4 | 3 | 2 | 1 | 0 |
| <b>4. Sediment Deposition</b>                  | Little or no enlargement of islands or point bars and less than 5% of the bottom affected by sediment deposition.                                                                                                                                                             |    |    |    |    | Some new increase in bar formation, mostly from gravel, sand or fine sediment; 5-30% of the bottom affected; slight deposition in pools.                                                                                                                    |    |    |    |    | Moderate deposition of new gravel, sand or fine sediment on old and new bars; 30-50% of the bottom affected; sediment deposits at obstructions, constrictions, and bends; moderate deposition of pools prevalent. |   |   |   |   | Heavy deposits of fine material, increased bar development; more than 50% of the bottom changing frequently; pools almost absent due to substantial sediment deposition. |   |   |   |   |   |
| <b>SCORE:</b> 16                               | 20                                                                                                                                                                                                                                                                            | 19 | 18 | 17 | 16 | 15                                                                                                                                                                                                                                                          | 14 | 13 | 12 | 11 | 10                                                                                                                                                                                                                | 9 | 8 | 7 | 6 | 5                                                                                                                                                                        | 4 | 3 | 2 | 1 | 0 |
| <b>5. Channel Flow Status</b>                  | Water reaches base of both lower banks, and minimal amount of channel substrate is exposed.                                                                                                                                                                                   |    |    |    |    | Water fills >75% of the available channel; or <25% of channel substrate is exposed.                                                                                                                                                                         |    |    |    |    | Water fills 25-75% of the available channel, and/or riffle substrates are mostly exposed.                                                                                                                         |   |   |   |   | Very little water in channel and mostly present as standing pools.                                                                                                       |   |   |   |   |   |
| <b>SCORE:</b> 10                               | 20                                                                                                                                                                                                                                                                            | 19 | 18 | 17 | 16 | 15                                                                                                                                                                                                                                                          | 14 | 13 | 12 | 11 | 10                                                                                                                                                                                                                | 9 | 8 | 7 | 6 | 5                                                                                                                                                                        | 4 | 3 | 2 | 1 | 0 |

Parameters to be evaluated in sampling reach

HABITAT ASSESSMENT FIELD DATA SHEET - HIGH GRADIENT STREAMS, PAGE 2

| Habitat Parameter                                                                                      | Condition Category                                                                                                                                                                                                                                                                      |            |    |    |    |                                                                                                                                                                                                                                                                              |    |    |    |    |                                                                                                                                                                                                              |    |   |   |   |                                                                                                                                                                                                     |   |   |   |   |   |   |
|--------------------------------------------------------------------------------------------------------|-----------------------------------------------------------------------------------------------------------------------------------------------------------------------------------------------------------------------------------------------------------------------------------------|------------|----|----|----|------------------------------------------------------------------------------------------------------------------------------------------------------------------------------------------------------------------------------------------------------------------------------|----|----|----|----|--------------------------------------------------------------------------------------------------------------------------------------------------------------------------------------------------------------|----|---|---|---|-----------------------------------------------------------------------------------------------------------------------------------------------------------------------------------------------------|---|---|---|---|---|---|
|                                                                                                        | Optimal                                                                                                                                                                                                                                                                                 |            |    |    |    | Suboptimal                                                                                                                                                                                                                                                                   |    |    |    |    | Marginal                                                                                                                                                                                                     |    |   |   |   | Poor                                                                                                                                                                                                |   |   |   |   |   |   |
| <b>6. Channel Alteration</b>                                                                           | Channelization or dredging absent or minimal; stream with normal pattern.                                                                                                                                                                                                               |            |    |    |    | Some channelization present, usually in areas of bridge abutments; evidence of past channelization, i.e., dredging, (>20 yr.) may be present, but recent channelization is not present.                                                                                      |    |    |    |    | Channelization may be extensive; embankments or shoring structures present on both banks; and 40 to 80% of stream reach channelized and disrupted.                                                           |    |   |   |   | Banks shored with gabion or cement; over 80% of the stream reach channelized and disrupted. In stream habitat greatly altered or removed entirely.                                                  |   |   |   |   |   |   |
| <b>SCORE:</b>                                                                                          | 15                                                                                                                                                                                                                                                                                      | 20         | 19 | 18 | 17 | 16                                                                                                                                                                                                                                                                           | 15 | 14 | 13 | 12 | 11                                                                                                                                                                                                           | 10 | 9 | 8 | 7 | 6                                                                                                                                                                                                   | 5 | 4 | 3 | 2 | 1 | 0 |
| <b>7. Frequency of Riffles (or bends)</b>                                                              | Occurrence of riffles relatively frequent; ratio of distance between riffles divided by width of the stream < 7:1 (generally 5 to 7); variety of habitat is key. In streams where riffles are continuous, placement of boulders or other large, natural obstruction.                    |            |    |    |    | Occurrence of riffles infrequent; distance between riffles divided by the width of the stream is between 7 to 15.                                                                                                                                                            |    |    |    |    | Occasional riffle or bend; bottom contours provide some habitat; distance between riffles divided by the width of the stream is between 15 to 25.                                                            |    |   |   |   | Generally all flat water or shallow riffles; poor habitat; distance between riffles divided by the width of the stream is a ration of > 25.                                                         |   |   |   |   |   |   |
| <b>SCORE:</b>                                                                                          | 14                                                                                                                                                                                                                                                                                      | 20         | 19 | 18 | 17 | 16                                                                                                                                                                                                                                                                           | 15 | 14 | 13 | 12 | 11                                                                                                                                                                                                           | 10 | 9 | 8 | 7 | 6                                                                                                                                                                                                   | 5 | 4 | 3 | 2 | 1 | 0 |
| <b>8. Bank Stability (score each bank)</b><br>Note: determine left or right side by facing downstream. | Banks stable; evidence of erosion or bank failure absent or minimal; little potential for future problems. <5% of bank affected.                                                                                                                                                        |            |    |    |    | Moderately stable; infrequent, small areas of erosion mostly healed over. 5-30% of bank in reach has areas of erosion.                                                                                                                                                       |    |    |    |    | Moderately unstable; 30- 60% of bank in reach has areas of erosion; high erosion potential during floods.                                                                                                    |    |   |   |   | Unstable; many eroded areas; "raw" areas frequent along straight sections and bends; obvious bank sloughing; 60-100% of bank has erosional scars.                                                   |   |   |   |   |   |   |
| <b>SCORE (LB):</b>                                                                                     | 7                                                                                                                                                                                                                                                                                       | Left Bank  |    | 10 | 9  | 8                                                                                                                                                                                                                                                                            | 7  | 6  | 5  | 4  | 3                                                                                                                                                                                                            | 2  | 1 | 0 |   |                                                                                                                                                                                                     |   |   |   |   |   |   |
| <b>SCORE (RB):</b>                                                                                     | 4                                                                                                                                                                                                                                                                                       | Right Bank |    | 10 | 9  | 8                                                                                                                                                                                                                                                                            | 7  | 6  | 5  | 4  | 3                                                                                                                                                                                                            | 2  | 1 | 0 |   |                                                                                                                                                                                                     |   |   |   |   |   |   |
| <b>9. Vegetative Protection (score each bank)</b>                                                      | More than 90% of the stream bank surfaces and immediate riparian zone covered by native vegetation, including trees, understory shrubs, or non- woody macrophytes; vegetative disruption through grazing or mowing minimal or not evident; almost all plants allowed to grow naturally. |            |    |    |    | 70-90% of the stream bank surfaces covered by native vegetation, but one class of plants is not well- represented; disruption evident but not affecting full plant growth potential to any great extent; more than one-half of the potential plant stubble height remaining. |    |    |    |    | 50-70% of the stream bank surfaces covered by vegetation; disruption obvious; patches of bare soil or closely cropped vegetation common; less than one-half of the potential plant stubble height remaining. |    |   |   |   | Less than 50% of the stream bank surfaces covered by vegetation; disruption of stream bank vegetation is very high; vegetation has been removed to 5 centimeters or less in average stubble height. |   |   |   |   |   |   |
| <b>SCORE (LB):</b>                                                                                     | 7                                                                                                                                                                                                                                                                                       | Left Bank  |    | 10 | 9  | 8                                                                                                                                                                                                                                                                            | 7  | 6  | 5  | 4  | 3                                                                                                                                                                                                            | 2  | 1 | 0 |   |                                                                                                                                                                                                     |   |   |   |   |   |   |
| <b>SCORE (RB):</b>                                                                                     | 5                                                                                                                                                                                                                                                                                       | Right Bank |    | 10 | 9  | 8                                                                                                                                                                                                                                                                            | 7  | 6  | 5  | 4  | 3                                                                                                                                                                                                            | 2  | 1 | 0 |   |                                                                                                                                                                                                     |   |   |   |   |   |   |
| <b>10. Riparian Vegetative Zone Width (score each bank riparian zone)</b>                              | Width of riparian zone >18 meters; human activities (i.e., parking lots, roadbeds, clear-cuts, lawns, or crops) have not impacted zone.                                                                                                                                                 |            |    |    |    | Width of riparian zone 12- 18 meters; human activities have impacted zone only minimally.                                                                                                                                                                                    |    |    |    |    | Width of riparian zone 6- 12 meters; human activities have impacted zone a great deal.                                                                                                                       |    |   |   |   | Width of riparian zone <6 meters: little or no riparian vegetation due to human activities.                                                                                                         |   |   |   |   |   |   |
| <b>SCORE (LB):</b>                                                                                     | 9                                                                                                                                                                                                                                                                                       | Left Bank  |    | 10 | 9  | 8                                                                                                                                                                                                                                                                            | 7  | 6  | 5  | 4  | 3                                                                                                                                                                                                            | 2  | 1 | 0 |   |                                                                                                                                                                                                     |   |   |   |   |   |   |
| <b>SCORE (RB):</b>                                                                                     | 9                                                                                                                                                                                                                                                                                       | Right Bank |    | 10 | 9  | 8                                                                                                                                                                                                                                                                            | 7  | 6  | 5  | 4  | 3                                                                                                                                                                                                            | 2  | 1 | 0 |   |                                                                                                                                                                                                     |   |   |   |   |   |   |
| <b>TOTAL SCORE:</b>                                                                                    | <b>137</b>                                                                                                                                                                                                                                                                              |            |    |    |    |                                                                                                                                                                                                                                                                              |    |    |    |    |                                                                                                                                                                                                              |    |   |   |   |                                                                                                                                                                                                     |   |   |   |   |   |   |

Parameters to be evaluated in sampling reach

**HABITAT ASSESSMENT FIELD DATA SHEET - HIGH GRADIENT STREAMS, PAGE 1**

|                                           |                       |                                                                      |                     |                                                           |
|-------------------------------------------|-----------------------|----------------------------------------------------------------------|---------------------|-----------------------------------------------------------|
| <b>STREAM NAME:</b> Downstream (DS) reach |                       | <b>LOCATION:</b> Woolper Creek Watershed, near Toyota parts facility |                     |                                                           |
| <b>STREAM WDT (FT):</b>                   | <b>DEPTH (FT):</b>    | <b>PERENNIAL</b>                                                     | <b>INTERMITTENT</b> | <b>EPHEMERAL</b>                                          |
| <b>STATION #:</b> N/A                     | <b>RIVERMILE:</b> N/A | <b>COUNTY:</b> Boone                                                 |                     | <b>STATE:</b> KY                                          |
| <b>LAT</b>                                |                       | <b>LONG</b>                                                          |                     |                                                           |
| <b>CLIENT:</b>                            |                       | <b>PROJECT NO.</b> EPA/ORD Pilot Project (i.e. Toyota retrofit)      |                     |                                                           |
| <b>INVESTIGATORS/CREW:</b> RJH            |                       |                                                                      |                     |                                                           |
| <b>FORM COMPLETED BY:</b> NLK             |                       | <b>DATE:</b> 4/29/2013                                               |                     | <b>REASON FOR SURVEY:</b> Pre-retrofit habitat assessment |
|                                           |                       | <b>TIME:</b>                                                         |                     |                                                           |

| Habitat Parameter                              | Condition Category                                                                                                                                                                                                                                                            |    |    |    |    |                                                                                                                                                                                                                                                             |    |    |    |    |                                                                                                                                                                                                                   |   |   |   |   |                                                                                                                                                                          |   |   |   |   |   |
|------------------------------------------------|-------------------------------------------------------------------------------------------------------------------------------------------------------------------------------------------------------------------------------------------------------------------------------|----|----|----|----|-------------------------------------------------------------------------------------------------------------------------------------------------------------------------------------------------------------------------------------------------------------|----|----|----|----|-------------------------------------------------------------------------------------------------------------------------------------------------------------------------------------------------------------------|---|---|---|---|--------------------------------------------------------------------------------------------------------------------------------------------------------------------------|---|---|---|---|---|
|                                                | Optimal                                                                                                                                                                                                                                                                       |    |    |    |    | Suboptimal                                                                                                                                                                                                                                                  |    |    |    |    | Marginal                                                                                                                                                                                                          |   |   |   |   | Poor                                                                                                                                                                     |   |   |   |   |   |
| <b>1. Epifaunal Substrate/ Available Cover</b> | Greater than 70% of substrate favorable for epifaunal colonization and fish cover; mix of snags, submerged logs, undercut banks, cobble or other stable habitat and at stage to allow full colonization potential (i.e., logs/snags that are not new fall and not transient). |    |    |    |    | 40-70% mix of stable habitat; well suited for full colonization potential; adequate habitat for maintenance of populations; presence of additional substrate in the form of newfall, but not yet prepared for colonization (may rate at high end of scale). |    |    |    |    | 20-40% mix of stable habitat; habitat availability less than desirable; substrate frequently disturbed or removed.                                                                                                |   |   |   |   | Less than 20% stable habitat; lack of habitat is obvious; substrate unstable or lacking.                                                                                 |   |   |   |   |   |
| <b>SCORE:</b> 10                               | 20                                                                                                                                                                                                                                                                            | 19 | 18 | 17 | 16 | 15                                                                                                                                                                                                                                                          | 14 | 13 | 12 | 11 | 10                                                                                                                                                                                                                | 9 | 8 | 7 | 6 | 5                                                                                                                                                                        | 4 | 3 | 2 | 1 | 0 |
| <b>2. Embeddedness</b>                         | Gravel, cobble, and boulder particles are 0-25% surrounded by fine sediment. Layering of cobble provides diversity of niche space.                                                                                                                                            |    |    |    |    | Gravel, cobble, and boulder particles are 25-50% surrounded by fine sediment.                                                                                                                                                                               |    |    |    |    | Gravel, cobble, and boulder particles are 50- 75% surrounded by fine Sediment.                                                                                                                                    |   |   |   |   | Gravel, cobble, and boulder particles are more than 75% surrounded by fine sediment.                                                                                     |   |   |   |   |   |
| <b>SCORE:</b> 11                               | 20                                                                                                                                                                                                                                                                            | 19 | 18 | 17 | 16 | 15                                                                                                                                                                                                                                                          | 14 | 13 | 12 | 11 | 10                                                                                                                                                                                                                | 9 | 8 | 7 | 6 | 5                                                                                                                                                                        | 4 | 3 | 2 | 1 | 0 |
| <b>3. Velocity/Depth Regime</b>                | All four velocity/depth regimes present (slowdeep, slow-shallow, fastdeep, fast-shallow). (Slow is < 0.3 m/s, deep is > 0.5 m.).                                                                                                                                              |    |    |    |    | Only 3 of the 4 regimes present (if fast-shallow is missing, score lower than if missing other regimes).                                                                                                                                                    |    |    |    |    | Only 2 of the 4 habitat regimes present (if fastshallow or slow-shallow are missing, score low).                                                                                                                  |   |   |   |   | Dominated by 1 velocity/depth regime (usually slow-deep).                                                                                                                |   |   |   |   |   |
| <b>SCORE:</b> 10                               | 20                                                                                                                                                                                                                                                                            | 19 | 18 | 17 | 16 | 15                                                                                                                                                                                                                                                          | 14 | 13 | 12 | 11 | 10                                                                                                                                                                                                                | 9 | 8 | 7 | 6 | 5                                                                                                                                                                        | 4 | 3 | 2 | 1 | 0 |
| <b>4. Sediment Deposition</b>                  | Little or no enlargement of islands or point bars and less than 5% of the bottom affected by sediment deposition.                                                                                                                                                             |    |    |    |    | Some new increase in bar formation, mostly from gravel, sand or fine sediment; 5-30% of the bottom affected; slight deposition in pools.                                                                                                                    |    |    |    |    | Moderate deposition of new gravel, sand or fine sediment on old and new bars; 30-50% of the bottom affected; sediment deposits at obstructions, constrictions, and bends; moderate deposition of pools prevalent. |   |   |   |   | Heavy deposits of fine material, increased bar development; more than 50% of the bottom changing frequently; pools almost absent due to substantial sediment deposition. |   |   |   |   |   |
| <b>SCORE:</b> 11                               | 20                                                                                                                                                                                                                                                                            | 19 | 18 | 17 | 16 | 15                                                                                                                                                                                                                                                          | 14 | 13 | 12 | 11 | 10                                                                                                                                                                                                                | 9 | 8 | 7 | 6 | 5                                                                                                                                                                        | 4 | 3 | 2 | 1 | 0 |
| <b>5. Channel Flow Status</b>                  | Water reaches base of both lower banks, and minimal amount of channel substrate is exposed.                                                                                                                                                                                   |    |    |    |    | Water fills >75% of the available channel; or <25% of channel substrate is exposed.                                                                                                                                                                         |    |    |    |    | Water fills 25-75% of the available channel, and/or riffle substrates are mostly exposed.                                                                                                                         |   |   |   |   | Very little water in channel and mostly present as standing pools.                                                                                                       |   |   |   |   |   |
| <b>SCORE:</b> 9                                | 20                                                                                                                                                                                                                                                                            | 19 | 18 | 17 | 16 | 15                                                                                                                                                                                                                                                          | 14 | 13 | 12 | 11 | 10                                                                                                                                                                                                                | 9 | 8 | 7 | 6 | 5                                                                                                                                                                        | 4 | 3 | 2 | 1 | 0 |

Parameters to be evaluated in sampling reach

HABITAT ASSESSMENT FIELD DATA SHEET - HIGH GRADIENT STREAMS, PAGE 2

| Habitat Parameter                                                                                      | Condition Category                                                                                                                                                                                                                                                                      |            |    |    |    |                                                                                                                                                                                                                                                                              |    |    |    |    |                                                                                                                                                                                                              |    |   |   |   |                                                                                                                                                                                                     |   |   |   |   |   |   |
|--------------------------------------------------------------------------------------------------------|-----------------------------------------------------------------------------------------------------------------------------------------------------------------------------------------------------------------------------------------------------------------------------------------|------------|----|----|----|------------------------------------------------------------------------------------------------------------------------------------------------------------------------------------------------------------------------------------------------------------------------------|----|----|----|----|--------------------------------------------------------------------------------------------------------------------------------------------------------------------------------------------------------------|----|---|---|---|-----------------------------------------------------------------------------------------------------------------------------------------------------------------------------------------------------|---|---|---|---|---|---|
|                                                                                                        | Optimal                                                                                                                                                                                                                                                                                 |            |    |    |    | Suboptimal                                                                                                                                                                                                                                                                   |    |    |    |    | Marginal                                                                                                                                                                                                     |    |   |   |   | Poor                                                                                                                                                                                                |   |   |   |   |   |   |
| <b>6. Channel Alteration</b>                                                                           | Channelization or dredging absent or minimal; stream with normal pattern.                                                                                                                                                                                                               |            |    |    |    | Some channelization present, usually in areas of bridge abutments; evidence of past channelization, i.e., dredging, (>20 yr.) may be present, but recent channelization is not present.                                                                                      |    |    |    |    | Channelization may be extensive; embankments or shoring structures present on both banks; and 40 to 80% of stream reach channelized and disrupted.                                                           |    |   |   |   | Banks shored with gabion or cement; over 80% of the stream reach channelized and disrupted. In stream habitat greatly altered or removed entirely.                                                  |   |   |   |   |   |   |
| <b>SCORE:</b>                                                                                          | 15                                                                                                                                                                                                                                                                                      | 20         | 19 | 18 | 17 | 16                                                                                                                                                                                                                                                                           | 15 | 14 | 13 | 12 | 11                                                                                                                                                                                                           | 10 | 9 | 8 | 7 | 6                                                                                                                                                                                                   | 5 | 4 | 3 | 2 | 1 | 0 |
| <b>7. Frequency of Riffles (or bends)</b>                                                              | Occurrence of riffles relatively frequent; ratio of distance between riffles divided by width of the stream < 7:1 (generally 5 to 7); variety of habitat is key. In streams where riffles are continuous, placement of boulders or other large, natural obstruction.                    |            |    |    |    | Occurrence of riffles infrequent; distance between riffles divided by the width of the stream is between 7 to 15.                                                                                                                                                            |    |    |    |    | Occasional riffle or bend; bottom contours provide some habitat; distance between riffles divided by the width of the stream is between 15 to 25.                                                            |    |   |   |   | Generally all flat water or shallow riffles; poor habitat; distance between riffles divided by the width of the stream is a ration of > 25.                                                         |   |   |   |   |   |   |
| <b>SCORE:</b>                                                                                          | 14                                                                                                                                                                                                                                                                                      | 20         | 19 | 18 | 17 | 16                                                                                                                                                                                                                                                                           | 15 | 14 | 13 | 12 | 11                                                                                                                                                                                                           | 10 | 9 | 8 | 7 | 6                                                                                                                                                                                                   | 5 | 4 | 3 | 2 | 1 | 0 |
| <b>8. Bank Stability (score each bank)</b><br>Note: determine left or right side by facing downstream. | Banks stable; evidence of erosion or bank failure absent or minimal; little potential for future problems. <5% of bank affected.                                                                                                                                                        |            |    |    |    | Moderately stable; infrequent, small areas of erosion mostly healed over. 5-30% of bank in reach has areas of erosion.                                                                                                                                                       |    |    |    |    | Moderately unstable; 30- 60% of bank in reach has areas of erosion; high erosion potential during floods.                                                                                                    |    |   |   |   | Unstable; many eroded areas; "raw" areas frequent along straight sections and bends; obvious bank sloughing; 60-100% of bank has erosional scars.                                                   |   |   |   |   |   |   |
| <b>SCORE (LB):</b>                                                                                     | 3                                                                                                                                                                                                                                                                                       | Left Bank  |    | 10 | 9  | 8                                                                                                                                                                                                                                                                            | 7  | 6  | 5  | 4  | 3                                                                                                                                                                                                            | 2  | 1 | 0 |   |                                                                                                                                                                                                     |   |   |   |   |   |   |
| <b>SCORE (RB):</b>                                                                                     | 2                                                                                                                                                                                                                                                                                       | Right Bank |    | 10 | 9  | 8                                                                                                                                                                                                                                                                            | 7  | 6  | 5  | 4  | 3                                                                                                                                                                                                            | 2  | 1 | 0 |   |                                                                                                                                                                                                     |   |   |   |   |   |   |
| <b>9. Vegetative Protection (score each bank)</b>                                                      | More than 90% of the stream bank surfaces and immediate riparian zone covered by native vegetation, including trees, understory shrubs, or non- woody macrophytes; vegetative disruption through grazing or mowing minimal or not evident; almost all plants allowed to grow naturally. |            |    |    |    | 70-90% of the stream bank surfaces covered by native vegetation, but one class of plants is not well- represented; disruption evident but not affecting full plant growth potential to any great extent; more than one-half of the potential plant stubble height remaining. |    |    |    |    | 50-70% of the stream bank surfaces covered by vegetation; disruption obvious; patches of bare soil or closely cropped vegetation common; less than one-half of the potential plant stubble height remaining. |    |   |   |   | Less than 50% of the stream bank surfaces covered by vegetation; disruption of stream bank vegetation is very high; vegetation has been removed to 5 centimeters or less in average stubble height. |   |   |   |   |   |   |
| <b>SCORE (LB):</b>                                                                                     | 3                                                                                                                                                                                                                                                                                       | Left Bank  |    | 10 | 9  | 8                                                                                                                                                                                                                                                                            | 7  | 6  | 5  | 4  | 3                                                                                                                                                                                                            | 2  | 1 | 0 |   |                                                                                                                                                                                                     |   |   |   |   |   |   |
| <b>SCORE (RB):</b>                                                                                     | 3                                                                                                                                                                                                                                                                                       | Right Bank |    | 10 | 9  | 8                                                                                                                                                                                                                                                                            | 7  | 6  | 5  | 4  | 3                                                                                                                                                                                                            | 2  | 1 | 0 |   |                                                                                                                                                                                                     |   |   |   |   |   |   |
| <b>10. Riparian Vegetative Zone Width (score each bank riparian zone)</b>                              | Width of riparian zone >18 meters; human activities (i.e., parking lots, roadbeds, clear-cuts, lawns, or crops) have not impacted zone.                                                                                                                                                 |            |    |    |    | Width of riparian zone 12- 18 meters; human activities have impacted zone only minimally.                                                                                                                                                                                    |    |    |    |    | Width of riparian zone 6- 12 meters; human activities have impacted zone a great deal.                                                                                                                       |    |   |   |   | Width of riparian zone <6 meters: little or no riparian vegetation due to human activities.                                                                                                         |   |   |   |   |   |   |
| <b>SCORE (LB):</b>                                                                                     | 9                                                                                                                                                                                                                                                                                       | Left Bank  |    | 10 | 9  | 8                                                                                                                                                                                                                                                                            | 7  | 6  | 5  | 4  | 3                                                                                                                                                                                                            | 2  | 1 | 0 |   |                                                                                                                                                                                                     |   |   |   |   |   |   |
| <b>SCORE (RB):</b>                                                                                     | 9                                                                                                                                                                                                                                                                                       | Right Bank |    | 10 | 9  | 8                                                                                                                                                                                                                                                                            | 7  | 6  | 5  | 4  | 3                                                                                                                                                                                                            | 2  | 1 | 0 |   |                                                                                                                                                                                                     |   |   |   |   |   |   |
| <b>TOTAL SCORE:</b>                                                                                    | <b>109</b>                                                                                                                                                                                                                                                                              |            |    |    |    |                                                                                                                                                                                                                                                                              |    |    |    |    |                                                                                                                                                                                                              |    |   |   |   |                                                                                                                                                                                                     |   |   |   |   |   |   |

Parameters to be evaluated in sampling reach



**HABITAT ASSESSMENT FIELD DATA SHEET - HIGH GRADIENT STREAMS, PAGE 1**

|                                           |                       |                                                                      |                     |                                                            |
|-------------------------------------------|-----------------------|----------------------------------------------------------------------|---------------------|------------------------------------------------------------|
| <b>STREAM NAME:</b> Downstream (DS) reach |                       | <b>LOCATION:</b> Woolper Creek Watershed, near Toyota parts facility |                     |                                                            |
| <b>STREAM WDTN (FT):</b>                  | <b>DEPTH (FT):</b>    | <b>PERENNIAL</b>                                                     | <b>INTERMITTENT</b> | <b>EPHEMERAL</b>                                           |
| <b>STATION #:</b> N/A                     | <b>RIVERMILE:</b> N/A | <b>COUNTY:</b> Boone                                                 |                     | <b>STATE:</b> KY                                           |
| <b>LAT</b>                                |                       | <b>LONG</b>                                                          |                     |                                                            |
| <b>CLIENT:</b>                            |                       | <b>PROJECT NO.</b> EPA/ORD Pilot Project (i.e. Toyota retrofit)      |                     |                                                            |
| <b>INVESTIGATORS/CREW:</b> RJH            |                       |                                                                      |                     |                                                            |
| <b>FORM COMPLETED BY:</b> NLK             |                       | <b>DATE:</b> 7/8/2019                                                |                     | <b>REASON FOR SURVEY:</b> Post-retrofit habitat assessment |
|                                           |                       | <b>TIME:</b>                                                         |                     |                                                            |

| Habitat Parameter                              | Condition Category                                                                                                                                                                                                                                                            |    |    |    |    |                                                                                                                                                                                                                                                             |    |    |    |    |                                                                                                                                                                                                                   |   |   |   |   |                                                                                                                                                                          |   |   |   |   |   |
|------------------------------------------------|-------------------------------------------------------------------------------------------------------------------------------------------------------------------------------------------------------------------------------------------------------------------------------|----|----|----|----|-------------------------------------------------------------------------------------------------------------------------------------------------------------------------------------------------------------------------------------------------------------|----|----|----|----|-------------------------------------------------------------------------------------------------------------------------------------------------------------------------------------------------------------------|---|---|---|---|--------------------------------------------------------------------------------------------------------------------------------------------------------------------------|---|---|---|---|---|
|                                                | Optimal                                                                                                                                                                                                                                                                       |    |    |    |    | Suboptimal                                                                                                                                                                                                                                                  |    |    |    |    | Marginal                                                                                                                                                                                                          |   |   |   |   | Poor                                                                                                                                                                     |   |   |   |   |   |
| <b>1. Epifaunal Substrate/ Available Cover</b> | Greater than 70% of substrate favorable for epifaunal colonization and fish cover; mix of snags, submerged logs, undercut banks, cobble or other stable habitat and at stage to allow full colonization potential (i.e., logs/snags that are not new fall and not transient). |    |    |    |    | 40-70% mix of stable habitat; well suited for full colonization potential; adequate habitat for maintenance of populations; presence of additional substrate in the form of newfall, but not yet prepared for colonization (may rate at high end of scale). |    |    |    |    | 20-40% mix of stable habitat; habitat availability less than desirable; substrate frequently disturbed or removed.                                                                                                |   |   |   |   | Less than 20% stable habitat; lack of habitat is obvious; substrate unstable or lacking.                                                                                 |   |   |   |   |   |
| <b>SCORE:</b> 15                               | 20                                                                                                                                                                                                                                                                            | 19 | 18 | 17 | 16 | 15                                                                                                                                                                                                                                                          | 14 | 13 | 12 | 11 | 10                                                                                                                                                                                                                | 9 | 8 | 7 | 6 | 5                                                                                                                                                                        | 4 | 3 | 2 | 1 | 0 |
| <b>2. Embeddedness</b>                         | Gravel, cobble, and boulder particles are 0-25% surrounded by fine sediment. Layering of cobble provides diversity of niche space.                                                                                                                                            |    |    |    |    | Gravel, cobble, and boulder particles are 25-50% surrounded by fine sediment.                                                                                                                                                                               |    |    |    |    | Gravel, cobble, and boulder particles are 50- 75% surrounded by fine Sediment.                                                                                                                                    |   |   |   |   | Gravel, cobble, and boulder particles are more than 75% surrounded by fine sediment.                                                                                     |   |   |   |   |   |
| <b>SCORE:</b> 15                               | 20                                                                                                                                                                                                                                                                            | 19 | 18 | 17 | 16 | 15                                                                                                                                                                                                                                                          | 14 | 13 | 12 | 11 | 10                                                                                                                                                                                                                | 9 | 8 | 7 | 6 | 5                                                                                                                                                                        | 4 | 3 | 2 | 1 | 0 |
| <b>3. Velocity/Depth Regime</b>                | All four velocity/depth regimes present (slowdeep, slow-shallow, fastdeep, fast-shallow). (Slow is < 0.3 m/s, deep is > 0.5 m.).                                                                                                                                              |    |    |    |    | Only 3 of the 4 regimes present (if fast-shallow is missing, score lower than if missing other regimes).                                                                                                                                                    |    |    |    |    | Only 2 of the 4 habitat regimes present (if fastshallow or slow-shallow are missing, score low).                                                                                                                  |   |   |   |   | Dominated by 1 velocity/depth regime (usually slow-deep).                                                                                                                |   |   |   |   |   |
| <b>SCORE:</b> 10                               | 20                                                                                                                                                                                                                                                                            | 19 | 18 | 17 | 16 | 15                                                                                                                                                                                                                                                          | 14 | 13 | 12 | 11 | 10                                                                                                                                                                                                                | 9 | 8 | 7 | 6 | 5                                                                                                                                                                        | 4 | 3 | 2 | 1 | 0 |
| <b>4. Sediment Deposition</b>                  | Little or no enlargement of islands or point bars and less than 5% of the bottom affected by sediment deposition.                                                                                                                                                             |    |    |    |    | Some new increase in bar formation, mostly from gravel, sand or fine sediment; 5-30% of the bottom affected; slight deposition in pools.                                                                                                                    |    |    |    |    | Moderate deposition of new gravel, sand or fine sediment on old and new bars; 30-50% of the bottom affected; sediment deposits at obstructions, constrictions, and bends; moderate deposition of pools prevalent. |   |   |   |   | Heavy deposits of fine material, increased bar development; more than 50% of the bottom changing frequently; pools almost absent due to substantial sediment deposition. |   |   |   |   |   |
| <b>SCORE:</b> 17                               | 20                                                                                                                                                                                                                                                                            | 19 | 18 | 17 | 16 | 15                                                                                                                                                                                                                                                          | 14 | 13 | 12 | 11 | 10                                                                                                                                                                                                                | 9 | 8 | 7 | 6 | 5                                                                                                                                                                        | 4 | 3 | 2 | 1 | 0 |
| <b>5. Channel Flow Status</b>                  | Water reaches base of both lower banks, and minimal amount of channel substrate is exposed.                                                                                                                                                                                   |    |    |    |    | Water fills >75% of the available channel; or <25% of channel substrate is exposed.                                                                                                                                                                         |    |    |    |    | Water fills 25-75% of the available channel, and/or riffle substrates are mostly exposed.                                                                                                                         |   |   |   |   | Very little water in channel and mostly present as standing pools.                                                                                                       |   |   |   |   |   |
| <b>SCORE:</b> 12                               | 20                                                                                                                                                                                                                                                                            | 19 | 18 | 17 | 16 | 15                                                                                                                                                                                                                                                          | 14 | 13 | 12 | 11 | 10                                                                                                                                                                                                                | 9 | 8 | 7 | 6 | 5                                                                                                                                                                        | 4 | 3 | 2 | 1 | 0 |

Parameters to be evaluated in sampling reach

HABITAT ASSESSMENT FIELD DATA SHEET - HIGH GRADIENT STREAMS, PAGE 2

| Habitat Parameter                                                                                      | Condition Category                                                                                                                                                                                                                                                                      |            |    |    |    |                                                                                                                                                                                                                                                                              |    |    |    |    |                                                                                                                                                                                                              |    |   |   |   |                                                                                                                                                                                                     |   |   |   |   |   |   |
|--------------------------------------------------------------------------------------------------------|-----------------------------------------------------------------------------------------------------------------------------------------------------------------------------------------------------------------------------------------------------------------------------------------|------------|----|----|----|------------------------------------------------------------------------------------------------------------------------------------------------------------------------------------------------------------------------------------------------------------------------------|----|----|----|----|--------------------------------------------------------------------------------------------------------------------------------------------------------------------------------------------------------------|----|---|---|---|-----------------------------------------------------------------------------------------------------------------------------------------------------------------------------------------------------|---|---|---|---|---|---|
|                                                                                                        | Optimal                                                                                                                                                                                                                                                                                 |            |    |    |    | Suboptimal                                                                                                                                                                                                                                                                   |    |    |    |    | Marginal                                                                                                                                                                                                     |    |   |   |   | Poor                                                                                                                                                                                                |   |   |   |   |   |   |
| <b>6. Channel Alteration</b>                                                                           | Channelization or dredging absent or minimal; stream with normal pattern.                                                                                                                                                                                                               |            |    |    |    | Some channelization present, usually in areas of bridge abutments; evidence of past channelization, i.e., dredging, (>20 yr.) may be present, but recent channelization is not present.                                                                                      |    |    |    |    | Channelization may be extensive; embankments or shoring structures present on both banks; and 40 to 80% of stream reach channelized and disrupted.                                                           |    |   |   |   | Banks shored with gabion or cement; over 80% of the stream reach channelized and disrupted. In stream habitat greatly altered or removed entirely.                                                  |   |   |   |   |   |   |
| <b>SCORE:</b>                                                                                          | 15                                                                                                                                                                                                                                                                                      | 20         | 19 | 18 | 17 | 16                                                                                                                                                                                                                                                                           | 15 | 14 | 13 | 12 | 11                                                                                                                                                                                                           | 10 | 9 | 8 | 7 | 6                                                                                                                                                                                                   | 5 | 4 | 3 | 2 | 1 | 0 |
| <b>7. Frequency of Riffles (or bends)</b>                                                              | Occurrence of riffles relatively frequent; ratio of distance between riffles divided by width of the stream < 7:1 (generally 5 to 7); variety of habitat is key. In streams where riffles are continuous, placement of boulders or other large, natural obstruction.                    |            |    |    |    | Occurrence of riffles infrequent; distance between riffles divided by the width of the stream is between 7 to 15.                                                                                                                                                            |    |    |    |    | Occasional riffle or bend; bottom contours provide some habitat; distance between riffles divided by the width of the stream is between 15 to 25.                                                            |    |   |   |   | Generally all flat water or shallow riffles; poor habitat; distance between riffles divided by the width of the stream is a ration of > 25.                                                         |   |   |   |   |   |   |
| <b>SCORE:</b>                                                                                          | 14                                                                                                                                                                                                                                                                                      | 20         | 19 | 18 | 17 | 16                                                                                                                                                                                                                                                                           | 15 | 14 | 13 | 12 | 11                                                                                                                                                                                                           | 10 | 9 | 8 | 7 | 6                                                                                                                                                                                                   | 5 | 4 | 3 | 2 | 1 | 0 |
| <b>8. Bank Stability (score each bank)</b><br>Note: determine left or right side by facing downstream. | Banks stable; evidence of erosion or bank failure absent or minimal; little potential for future problems. <5% of bank affected.                                                                                                                                                        |            |    |    |    | Moderately stable; infrequent, small areas of erosion mostly healed over. 5-30% of bank in reach has areas of erosion.                                                                                                                                                       |    |    |    |    | Moderately unstable; 30- 60% of bank in reach has areas of erosion; high erosion potential during floods.                                                                                                    |    |   |   |   | Unstable; many eroded areas; "raw" areas frequent along straight sections and bends; obvious bank sloughing; 60-100% of bank has erosional scars.                                                   |   |   |   |   |   |   |
| <b>SCORE (LB):</b>                                                                                     | 7                                                                                                                                                                                                                                                                                       | Left Bank  |    | 10 | 9  | 8                                                                                                                                                                                                                                                                            | 7  | 6  | 5  | 4  | 3                                                                                                                                                                                                            | 2  | 1 | 0 |   |                                                                                                                                                                                                     |   |   |   |   |   |   |
| <b>SCORE (RB):</b>                                                                                     | 8                                                                                                                                                                                                                                                                                       | Right Bank |    | 10 | 9  | 8                                                                                                                                                                                                                                                                            | 7  | 6  | 5  | 4  | 3                                                                                                                                                                                                            | 2  | 1 | 0 |   |                                                                                                                                                                                                     |   |   |   |   |   |   |
| <b>9. Vegetative Protection (score each bank)</b>                                                      | More than 90% of the stream bank surfaces and immediate riparian zone covered by native vegetation, including trees, understory shrubs, or non- woody macrophytes; vegetative disruption through grazing or mowing minimal or not evident; almost all plants allowed to grow naturally. |            |    |    |    | 70-90% of the stream bank surfaces covered by native vegetation, but one class of plants is not well- represented; disruption evident but not affecting full plant growth potential to any great extent; more than one-half of the potential plant stubble height remaining. |    |    |    |    | 50-70% of the stream bank surfaces covered by vegetation; disruption obvious; patches of bare soil or closely cropped vegetation common; less than one-half of the potential plant stubble height remaining. |    |   |   |   | Less than 50% of the stream bank surfaces covered by vegetation; disruption of stream bank vegetation is very high; vegetation has been removed to 5 centimeters or less in average stubble height. |   |   |   |   |   |   |
| <b>SCORE (LB):</b>                                                                                     | 7                                                                                                                                                                                                                                                                                       | Left Bank  |    | 10 | 9  | 8                                                                                                                                                                                                                                                                            | 7  | 6  | 5  | 4  | 3                                                                                                                                                                                                            | 2  | 1 | 0 |   |                                                                                                                                                                                                     |   |   |   |   |   |   |
| <b>SCORE (RB):</b>                                                                                     | 8                                                                                                                                                                                                                                                                                       | Right Bank |    | 10 | 9  | 8                                                                                                                                                                                                                                                                            | 7  | 6  | 5  | 4  | 3                                                                                                                                                                                                            | 2  | 1 | 0 |   |                                                                                                                                                                                                     |   |   |   |   |   |   |
| <b>10. Riparian Vegetative Zone Width (score each bank riparian zone)</b>                              | Width of riparian zone >18 meters; human activities (i.e., parking lots, roadbeds, clear-cuts, lawns, or crops) have not impacted zone.                                                                                                                                                 |            |    |    |    | Width of riparian zone 12- 18 meters; human activities have impacted zone only minimally.                                                                                                                                                                                    |    |    |    |    | Width of riparian zone 6- 12 meters; human activities have impacted zone a great deal.                                                                                                                       |    |   |   |   | Width of riparian zone <6 meters: little or no riparian vegetation due to human activities.                                                                                                         |   |   |   |   |   |   |
| <b>SCORE (LB):</b>                                                                                     | 9                                                                                                                                                                                                                                                                                       | Left Bank  |    | 10 | 9  | 8                                                                                                                                                                                                                                                                            | 7  | 6  | 5  | 4  | 3                                                                                                                                                                                                            | 2  | 1 | 0 |   |                                                                                                                                                                                                     |   |   |   |   |   |   |
| <b>SCORE (RB):</b>                                                                                     | 9                                                                                                                                                                                                                                                                                       | Right Bank |    | 10 | 9  | 8                                                                                                                                                                                                                                                                            | 7  | 6  | 5  | 4  | 3                                                                                                                                                                                                            | 2  | 1 | 0 |   |                                                                                                                                                                                                     |   |   |   |   |   |   |
| <b>TOTAL SCORE:</b>                                                                                    | <b>146</b>                                                                                                                                                                                                                                                                              |            |    |    |    |                                                                                                                                                                                                                                                                              |    |    |    |    |                                                                                                                                                                                                              |    |   |   |   |                                                                                                                                                                                                     |   |   |   |   |   |   |

Parameters to be evaluated in sampling reach
